1 Cell environment shapes TDP-43 function: implications in neuronal  
2 and muscle disease

3

4 Urša Šušnjar<sup>1</sup>, Neva Škrabar<sup>2,3</sup>, Anna-Leigh Brown<sup>4</sup>, Yasmine Abbassi<sup>1</sup>, NYGC ALS  
5 Consortium<sup>5</sup>, Hemali Phatnani<sup>5,6</sup>, Andrea Cortese<sup>4,7</sup>, Cristina Cereda<sup>8</sup>, Enrico Bugiardini<sup>4</sup>,  
6 Rosanna Cardani<sup>9</sup>, Giovanni Meola<sup>10,11</sup>, Michela Ripolone<sup>12</sup>, Maurizio Moggio<sup>12</sup>, Maurizio  
7 Romano<sup>13</sup>, Maria Secrier<sup>14</sup>, Pietro Fratta<sup>4,5</sup>, Emanuele Buratti<sup>1\*</sup>

8

9 <sup>1</sup> Molecular Pathology Lab, International Centre for Genetic Engineering and Biotechnology  
10 (ICGEB), Trieste, Italy.

11 <sup>2</sup> Tumour Virology Lab, International Centre for Genetic Engineering and Biotechnology  
12 (ICGEB), Trieste, Italy.

13 <sup>3</sup> Generatio GmbH, Center for Animal, Genetics, Tübingen, Germany.

14 <sup>4</sup> Department of Neuromuscular Diseases, UCL Queen Square Institute of Neurology, London,  
15 UK.

16 <sup>5</sup> A complete list of the NYGC ALS Consortium members is found in the Supplemental  
17 Acknowledgments file.

18 <sup>6</sup> Center for Genomics of Neurodegenerative Disease, New York Genome Center, New York,  
19 USA.

20 <sup>7</sup> Department of Brain and Behaviour Sciences, University of Pavia, Pavia, Italy.

21 <sup>8</sup> Genomic and post-Genomic Unit, IRCCS Mondino Foundation, Pavia, Italy.

22 <sup>9</sup> BioCor Biobank, UOC SMEL-1 of Clinical Pathology, IRCCS-Policlinico San Donato, San  
23 Donato Milanese, Italy.

24 <sup>10</sup> Department of Biomedical Sciences for Health, University of Milan, Milan, Italy.

25 <sup>11</sup> Department of Neurorehabilitation Sciences, Casa di Cura del Policlinico, Milan, Italy.

26 <sup>12</sup> Neuromuscular and Rare Diseases Unit, Department of Neuroscience, Fondazione IRCCS  
27 Ca' Granda Ospedale Maggiore Policlinico, Milan, Italy.

28 <sup>13</sup> Department of Life Sciences, University of Trieste, Trieste, Italy.

29 <sup>14</sup> UCL Genetics Institute, Department of Genetics, Evolution and Environment, University  
30 College London, UK.

31

32 **\*Corresponding author** Emanuele Buratti, [buratti@icgeb.org](mailto:buratti@icgeb.org)

## 33 ABSTRACT

34

35 TDP-43 aggregation and redistribution have been recognised as a hallmark of amyotrophic  
36 lateral sclerosis, frontotemporal dementia and other neurological disorders. While TDP-43 has  
37 been studied extensively in neuronal tissues, TDP-43 inclusions have also been described in  
38 the muscle of inclusion body myositis patients, highlighting the need to understand the role of  
39 TDP-43 beyond the central nervous system. Using RNA-seq we performed the first direct  
40 comparison of TDP-43-mediated transcription and alternative splicing in muscle (C2C12) and  
41 neuronal (NSC34) mouse cells. Our results clearly show that TDP-43 displays a tissue-  
42 characteristic behaviour targeting unique transcripts in each cell type. This is not due to  
43 variable transcript abundance but rather due to cell-specific expression of RNA-binding  
44 proteins, which influences TDP-43 performance. Among splicing events commonly  
45 dysregulated in both cell lines, we identified some that are TDP-43-dependent also in human  
46 cells and show that inclusion levels of these alternative exons appear to be differentially altered  
47 in affected tissues of FTLD and IBM patients. We therefore propose that TDP-43 dysfunction,  
48 reflected in aberrant splicing, contributes to disease development but it does so in a tissue- and  
49 disease-specific manner.

50

51 **Keywords** alternative splicing / ALS-FTLD / IBM / muscle / TDP-43

52

## 53 INTRODUCTION

54

55 TDP-43, a protein encoded by the *TARDBP* gene, is a ubiquitously expressed member of  
56 hnRNP family able to bind DNA and RNA that participates in various steps of mRNA  
57 metabolism including transcription, pre-mRNA splicing, miRNA generation, regulation of  
58 mRNA stability, nucleo-cytoplasmic transport and translation (Birsa *et al*, 2020; Budini &  
59 Buratti, 2011; Ederle & Dormann, 2017; Buratti & Baralle, 2012). TDP-43 was initially  
60 described as the major component of cytoplasmic inclusions formed in motor neurons of  
61 patients suffering from amyotrophic lateral sclerosis (ALS) and frontotemporal dementia  
62 (FTLD) despite the fact that mutations in *TARDBP* gene only account for a small subset of  
63 those cases (Arai *et al*, 2006; Buratti, 2015; Neumann *et al*, 2006). However, TDP-43  
64 aggregates have as well been found in skeletal muscles of patients with inclusion body myositis

65 (IBM) (Salajegheh *et al*, 2009; Wehl *et al*, 2008), oculopharyngeal muscular dystrophy  
66 (OPMD) (Yamashita *et al*, 2013) and limb girdle muscular dystrophy type 2a (LGMD2a)  
67 (Harms *et al*, 2012) suggesting that TDP-43 aggregation may play a prominent pathological  
68 role also in muscle tissue. Accordingly, TDP-43 myogranules have been shown to provide  
69 essential functions during skeletal muscle development and regeneration, both in mouse and  
70 human (Vogler *et al*, 2018). Despite ubiquitous expression of TDP-43, however, most studies  
71 investigating this protein have focused on its role in the central nervous system. Nonetheless,  
72 given its importance of TDP-43, both in muscle development and potentially in the  
73 pathogenesis of numerous myopathies, we systematically investigate functions elicited by  
74 TDP-43 in muscle (C2C12) and neuronal (NSC34) mouse cells in parallel.

75 Performing such a comparison is particularly interesting as these two cell environments display  
76 tissue-characteristic features, like for example: distinct post-translational modifications  
77 (PTMs) and cleavage products of TDP-43 described in muscles and neurons (Buratti, 2018),  
78 muscle-characteristic localization of TDP-43 in space and time (Vogler *et al*, 2018), cell-type-  
79 specific milieu of TDP-43 binding partners (Mele *et al*, 2015), and differential expression of  
80 RNA binding proteins (RBPs) controlling common mRNA targets (Appocher *et al*, 2017;  
81 Cappelli *et al*, 2018). It is important to note that all these differences occur in a context of  
82 highly variable transcriptome between tissues including non-coding transcripts (Cabali *et al*,  
83 2011; Jiang *et al*, 2016; Ludwig *et al*, 2016). Therefore, TDP-43 might likely elicit tissue  
84 characteristic functions by targeting unique subsets of transcripts, which encode proteins  
85 participating in tissue-specific cellular pathways and provide crucial structural and functional  
86 features of a cell. The consequences of TDP-43 dysfunction in muscles could thus possibly  
87 differ from those that have so far been described in the central nervous tissue (Polymenidou *et*  
88 *al*, 2011; Tollervey *et al*, 2011).

89 In the last decade, high throughput methodologies have shifted the focus from characterization  
90 of individual events towards less biased global approaches, setting the ground for a systematic  
91 comparison of TDP-43 targeted RNAs across tissues and conditions. However, the overlap of  
92 TDP-43-controlled events identified by earlier studies is rather poor. It probably reflects the  
93 variation in technical approaches (microarrays, RNA-seq, CLIP-seq) and models employed in  
94 those studies: mouse brain (Polymenidou *et al*, 2011), human-post mortem brain samples  
95 (Tollervey *et al*, 2011; Prudencio *et al*, 2020), human neuroblastoma cell line SH-SY5Y (Fiesel  
96 *et al*, 2012; Tollervey *et al*, 2011), HEK-293 (De Conti *et al*, 2015; Prpar Mihevc *et al*, 2016),  
97 Hela (Prudencio *et al*, 2012). A clearer understanding of the extent to which TDP-43-mediated  
98 events are conserved between mouse and human is still lacking, yet it is a crucial point that

99 should be addressed in future as it will allow better comparisons of human and mouse models  
100 of disease.

101 To finally address this issue in a systematic manner, we have identified subsets of unique cell-  
102 type-specific mRNA targets, as well as commonly regulated mRNAs, the tight regulation of  
103 which might underlie functions crucial for cell survival. More specifically, we have further  
104 explored splicing events that commonly occur in C2C12 and NSC34 cells and are additionally  
105 conserved in humans. We finally show that inclusion of common mouse-human TDP-43-  
106 regulated alternative exons is indeed altered in skeletal muscles of IBM patients and different  
107 brain regions of ALS and FTLN patients with reported TDP-43 pathology.

108

## 109 RESULTS

110

### 111 **TDP-43 expression is similar in C2C12 and NSC34 cells**

112 To start comparing the functions of TDP-43 in cells of muscular and neuronal origin, we used  
113 the most commonly employed mouse cell lines representing skeletal muscle (C2C12) and  
114 motor neurons (NSC34). They have been previously used to study TDP-43-associated  
115 neurodegeneration as well as the role of TDP-43 in muscle development (Budini *et al*, 2015;  
116 Colombrita *et al*, 2009; Militello *et al*, 2018; Vogler *et al*, 2018). We first assessed protein  
117 levels of endogenous TDP-43 in untreated cells (**Fig 1A**). Although in mature mouse tissues  
118 TDP-43 expression was reported to be higher in the brain compared to quadriceps muscle  
119 (Jeong *et al*, 2017), we noted no difference in the amount of total TDP-43 protein between  
120 undifferentiated C2C12 and NSC34 cells (**Fig 1A**), nor in the expression of TDP-43 at the  
121 RNA level of siLUC-transfected cells (**Fig 1B**).

122 TDP-43 was silenced to a similar extent in both cell lines (**Fig 1B**) and reduction of the protein  
123 was confirmed by western blot (**Fig 1C**). TDP-43 loss functionally reflected in altered splicing  
124 of the two well characterized target transcripts *Poldip3* and *Sort1* (**Fig 1D**) (Fiesel *et al*, 2012;  
125 Mohagheghi *et al*, 2016; Prudencio *et al*, 2012; Shiga *et al*, 2012). To explore transcriptome-  
126 wide effects of TDP-43 downregulation, we then performed deep RNA-seq analysis on  
127 polyadenylated mRNA extracted from TDP-43 depleted cells. Both cell lines displayed a  
128 characteristic transcriptional signature as revealed by PCA (PC1), whereas the effect of TDP-  
129 43 knockdown explained a smaller portion of the variation between samples (PC2) (**Fig 1E**).  
130 This result suggests that TDP-43 silencing promotes transcriptional alterations in C2C12 and  
131 NSC34 based on the tissue-characteristic transcriptional profile.

132

133 **mRNAs dysregulation following TDP-43 reduction in C2C12 and NSC34 cells is cell-type**  
134 **specific**

135 Tissues vary substantially in transcription levels of individual genes and splice isoforms they  
136 express, and these differences underlie specific biological characteristics and functions. To  
137 examine the effect of TDP-43 loss on expression levels (differential gene expression, DEG) in  
138 the two cell lines, we separately normalized reads of C2C12 and NSC34 datasets and obtained  
139 4019 transcripts, expression levels of which were subject to TDP-43 regulation. At  $p_{\text{adj}} < 0.05$ ,  
140 we detected a very similar number of DEG in C2C12 and NSC34 (2325 and 2324,  
141 respectively), with 630 (15.7%) transcripts being commonly dysregulated in both cell lines  
142 (**Fig 2A**). Surprisingly enough, the small overlap could not be explained by the fact that some  
143 genes are expressed in a tissue-specific manner (i.e., muscle characteristic genes are not  
144 transcribed in neuronal cells and *vice versa*), as the overlap between TDP-43 targets remained  
145 small (19.3%) even if we only considered genes expressed in both cell lines (FPKM in both  
146 cell lines  $> 0.5$ ) (**Fig 2B**). However, our data indicated that TDP-43 targets regulated in a cell-  
147 type-specific fashion are highly expressed in one cell type but not in the other. On average,  
148 C2C12-specific TDP-43-regulated mRNAs show higher expression in C2C12 than in NSC34  
149 cells, and *vice versa* (**Appendix Fig S1A**).

150 It has previously been proposed that TDP-43 binding is needed to sustain pre-mRNA levels  
151 and that mRNA downregulation would be a direct consequence of TDP-43 loss, while mRNA  
152 upregulation was explained by indirect effects (Polymenidou *et al*, 2011). In our datasets (**Fig**  
153 **2A**), the number of downregulated genes slightly outnumbered genes that were upregulated  
154 following TDP-43 depletion (**Appendix Fig S1B**), however, the overlap was very similar,  
155 irrespective the direction of the change (14.0% and 15.0% for upregulated and downregulated  
156 transcripts, respectively). Comparing the extent of expression changes of commonly regulated  
157 transcripts (630) induced by TDP-43 reduction, we saw a positive correlation ( $\phi = 0.77$ , p-  
158 value  $< 0.001$ ) between the two cell lines, with a trend towards larger alternations in C2C12  
159 (**Fig 2C**). Of note, there were few mRNAs whose expression was altered in the opposite  
160 direction in the two cell lines, indicating that TDP-43 loss can elicit contrary effects (*loss-of-*  
161 *function vs. gain-of-function*) depending on the cellular environment. Looking at individual  
162 target transcripts (**Fig 2D, Appendix Fig S1C and D**), we hypothesized that the biggest  
163 transcriptional changes induced by TDP-43 loss occurred in highly expressed genes. However,  
164 plotting the size of the change ( $\log_2$  fold change) against background expression levels (FPKM

165 in siLUC transfected cells) of all DEGs revealed that there is in fact no correlation between the  
166 two (**Appendix Fig S1E**).

167 Taken together, these results support the idea that unique sets of transcripts controlled by TDP-  
168 43 in each cell type can only partially be explained by variable expression levels of cell-type-  
169 characteristic mRNAs across tissues. Factors other than expression levels as such thus  
170 influence TDP-43 function that seems to be tissue-specific. At the sequence level, in fact, TDP-  
171 43-regulated mRNAs detected in C2C12 or NSC34 appear to be equally well conserved across  
172 species (**Appendix Fig S1F**).

173

### 174 **Commonly enriched processes implicated in neurodegenerative and myodegenerative** 175 **disease**

176 In the mouse brain, TDP-43 has been shown crucial for maintenance of mRNAs that encode  
177 proteins involved in synaptic activity (Polymenidou *et al*, 2011). To elucidate which cellular  
178 processes might be controlled by TDP-43 in cells of muscle and neuronal origin, we conducted  
179 enrichment analysis of genes differentially expressed in C2C12 (2325) and NSC34 (2324) (**Fig**  
180 **2E**). Among C2C12 enriched GO terms, we found those directly associated with muscle  
181 characteristic features like *striated muscle development* or *muscle cell migration*, in line with  
182 results highlighting the importance of TDP-43 in skeletal muscle formation and regeneration  
183 (Militello *et al*, 2018; Vogler *et al*, 2018). On the other hand, a great portion of neuronal  
184 processes like *vesicle-mediated transport in synapse* or *regulation of postsynaptic membrane*  
185 *neurotransmitters* appeared to be affected by TDP-43 loss in NSC34 cells.

186 While the percentage of overlapping DEG was only 15.7%, by GO categories, almost a third  
187 of all biological processes (28%) enriched in C2C12 or NSC34 DEGs (**Fig 2E**) was commonly  
188 dysregulated upon TDP-43 depletion in both cell lines. Given that currently proposed picture  
189 of pathological processes implicated in myopathies bears several similarities with  
190 neurodegenerative disease (Askanas *et al*, 2015, 2012; Weihl *et al*, 2008), we investigated  
191 commonly enriched GO terms to see, if any of them could detect abnormalities previously  
192 described in the above-mentioned diseases. Significant GO terms enriched by DEG in both  
193 C2C12 and NSC34 (**Fig 2F**) suggest that some common TDP-43-mediated mechanisms might  
194 contribute to development of TDP-43-proteinopathies in both muscle and neuronal tissues.  
195 Pathomechanisms include aberrant protein accumulation (i.e., ubiquitin, amyloid  $\beta$ ,  $\alpha$ -  
196 synuclein, phosphorylated  $\tau$  and TDP-43), post-translational modifications of deposited  
197 proteins (phosphorylation, ubiquitination, acetylation, sumoylation), defects in protein disposal

198 (26S proteasome and autophagy) and mitochondrial abnormalities. However, while there was  
199 a greater overlap between biological response to TDP-43 depletion (GO: biological process),  
200 the specific differentially expressed transcripts in common terms were remarkably different  
201 between C2C12 and NSC34 (**Appendix Fig S1G**). This implies that TDP-43 can influence  
202 similar biological processes in both muscles and neurons, but it does so by mediating  
203 expression levels of genes encoding for distinct proteins that participate in those pathways.

204

### 205 **TDP-43-mediated splicing is more pronounced in NSC34 cells**

206 Along with mRNA depletion, aberrant pre-mRNA splicing has been described to contribute to  
207 neuronal vulnerability as a consequence of pathologic TDP-43 behaviour (Arnold *et al*, 2013;  
208 Polymenidou *et al*, 2011; Tollervey *et al*, 2011). Yet, little is understood about how TDP-43  
209 dysfunction affects pre-mRNA splicing in tissues beyond the central nervous system. In this  
210 work, we systematically compared alternative splicing (AS) alterations following TDP-43  
211 reduction in C2C12 and NSC34 cells. As expected, a considerably lower number of splicing  
212 events was detected in C2C12 than in NSC34 cells (730 and 1270, respectively) at FDR of 0.01  
213 (**Fig 3A**), which held true for events of any classical AS category (i.e., SE, MXE, RI, A3'SS,  
214 A5'SS) (**Fig 3B**). Neuronal and muscular targets did not vary with regard to event type  
215 proportion (**Appendix Fig S2A**); length of cassette exons (**Appendix Fig S2B**); the ratio  
216 between inclusion/exclusion events (**Appendix Fig S2C**); or percentage of frame-conserving  
217 events (**Appendix Fig S2D**). Interestingly enough, alternative sequences regulated by TDP-43  
218 in the neuronal cell line seem to be more conserved across species than TDP-43-regulated  
219 sequences in muscle cell line (**Appendix Fig S2E**). This holds true particularly for cassette  
220 exons (**Appendix Fig S2F**), which represent the most frequent event type detected by our  
221 pipeline (**Appendix Fig S2A**).

222 This observation that TDP-43 regulates more events in NSC34 cells might reflect the  
223 importance of alternative splicing as a regulatory mechanism in neurons and support the  
224 existence of a distinct splicing program in neuronal tissues, as already suggested by others  
225 (Irimia *et al*, 2014; Mele *et al*, 2015; Yeo *et al*, 2004). Moreover, very few AS events (on  
226 average 5.2%) appear to be commonly regulated by TDP-43 in both cell types, with the  
227 percentage of overlapping AS events being small (5.8%) even when we only considered AS in  
228 transcripts commonly expressed in both cell lines (FPKM > 0.5) (**Fig 3C**) or when we used a  
229 less stringent overlap threshold (**Appendix Fig S2G**).

230 Jeong et al. (Jeong *et al*, 2017) have previously reported that TDP-43's repression of cryptic  
231 exons is tissue-specific. This posed a question whether annotated TDP-43-controlled events  
232 (**Fig 3A and 3B**) display more or less tissue-variation compared to TDP-43-repressed cryptic  
233 exons. As rMATS, the splicing tool used to identify annotated AS events, is not capable of  
234 identifying non-canonical splicing we used a separate analysis tool, MAJIQ (Green *et al*, 2018),  
235 that allows quantification of both, novel (cryptic) and regular (annotated) AS events. MAJIQ  
236 and rMATS quantify in separate ways (Mehmood *et al*, 2020), thus comparable results are only  
237 produced (junctions or AS events, respectively) when the same pipeline is applied. Using  
238 MAJIQ, we show that the percentage of commonly detected cryptic splicing is in fact bigger  
239 than that of commonly detected classical AS events (**Fig 3D**) (21.6% and 15.5%, respectively),  
240 implying that TDP-43 displays tissue-specific behaviour in cryptic repression but even more  
241 so in control of classical alternative exons.

242

### 243 **Alternatively spliced TDP-43 targets are implicated in neuronal functions and DNA-** 244 **related processes**

245 We further employed GO analysis to see whether genes with TDP-43-regulated splicing  
246 identified in C2C12 and NSC34 form interconnected networks and if TDP-43 can, by  
247 mediating AS, influence particular biological processes in each cell type. Since the number of  
248 C2C12 AS genes entering GO analysis (578) was considerably lower than that of NSC34 genes  
249 (1018), the analysis resulted in fewer GO terms found to be enriched in C2C12 compared to  
250 many in NSC34 (23 and 203, respectively) (**Fig 3E**). As expected, GO terms enriched in  
251 NSC34 cells exclusively suggest that in these cells, alternatively spliced mRNA predominantly  
252 encode for proteins implicated in processes taking place in the nervous system (e.g.,  
253 *axonogenesis, regulation of neuron differentiation*) (**Fig 3F**). This is in line with earlier studies,  
254 which demonstrated that in human neuroblastoma cells SH-SY5Y TDP-43-dependent splice  
255 isoforms encode for proteins regulating neuronal development and those involved in  
256 neurodegenerative disease (Tollervey *et al*, 2011).

257 On the other hand, GO terms (56%) enriched in C2C12 cells exclusively (**Fig 3G**) suggested  
258 involvement of AS genes in DNA-related processes (e.g., *covalent chromatin modification* or  
259 *regulation of chromosome organization*), while only one implied a muscle characteristic  
260 feature (i.e., *regulation of cardiac muscle cell action potential*). As we thought this observation  
261 might be biased due to the low number of GO terms detected in C2C12 (18), we repeated  
262 enrichment analysis, this time using a more relaxed threshold (non-corrected p-value < 0.01



263 instead of  $FDR < 0.01$ ) on AS genes that would enter GO analysis. However, even among 45  
264 enriched GO terms obtained using less stringent threshold, DNA-related processes comprised  
265 more than a third of all GO terms (36%, **Appendix Fig S2H**), which was not the case for  
266 NSC34 cells.

267

### 268 **Different RBPs are expressed in NSC34 and C2C12 cells**

269 The observation that TDP-43 loss elicits a tissue-characteristic response did not come as a  
270 surprise, as RNA binding proteins (RBPs) other than TDP-43 might be differentially expressed  
271 in these cells. Inspecting expression levels of some RNA-binding proteins (Mele *et al*, 2015),  
272 which either directly interact with TDP-43 (Freibaum *et al*, 2010) or influence processing of  
273 its target transcripts (Cappelli *et al*, 2018; Lagier-Tourenne *et al*, 2012; Mohagheghi *et al*,  
274 2016), we saw a higher average expression of RBPs in neuronal NSC34 cells (**Fig 4A**) in line  
275 with previous observations (Mele *et al*, 2015). Their joint functions in coordinating mRNA  
276 processing might underlie a more complex splicing regulation that is unique for neuronal  
277 tissues and explain why TDP-43-regulated splicing is more frequent in NSC34 than in C2C12  
278 cells (**Fig 3A**). The two cell types clearly express a distinct array of RBPs (**Fig 4B**), while  
279 transcription levels of some are additionally affected by TDP-43 depletion (**Fig 4C**).

280

### 281 **Common TDP-43 splicing targets detected in C2C12 and NSC34**

282 Previous studies have already disclosed lists of transcripts, whose splicing is affected by TDP-  
283 43 removal or dysfunction (Colombrita *et al*, 2009; De Conti *et al*, 2015; Lagier-Tourenne *et*  
284 *al*, 2012; Tollervey *et al*, 2011). Yet, the reproducibility of target identification is rather poor,  
285 possibly due to differences in methodological approaches, low conservation of TDP-43 targets  
286 across species (Colombrita *et al*, 2009), and, as we show, the unique function TDP-43 elicits  
287 in each tissue or cell type. The most consistently reported TDP-43-regulated splicing event  
288 across studies and conditions is skipping exon 3 within *Poldip3/POLDIP3* mRNA (both mouse  
289 and human) (Fiesel *et al*, 2012). This being so, inclusion level (percent spliced in,  $\Delta$ PSI) of  
290 *Poldip3* exon 3 often serves as a readout of TDP-43 functionality (Cortese *et al*, 2018; Klim *et*  
291 *al*, 2019; Roczniak-Ferguson & Ferguson, 2020). In search of new splicing events that would,  
292 similarly to *Poldip3/POLDIP3*, show high reproducibility across experimental settings, we  
293 chose mRNAs that underwent the biggest shift in TDP-43-dependent exon inclusion and whose  
294 isoform proportion was altered in both C2C12 and NSC34 cells. The isoform switch of these  
295 targets was validated using isoform-sensitive semi-quantitative RT-PCR (**Fig 5A**).

296 Compared to cell-type-specific TDP-43 targets, commonly spliced transcripts on average show  
297 higher expression in C2C12 and NSC34 cells than transcripts alternatively spliced in a cell-  
298 type-specific manner (**Fig 5B**). Furthermore, commonly detected events display bigger splicing  
299 transitions (bigger  $\Delta$ PSI) (**Fig 4C**). Most of the splicing changes detected in C2C12 and NSC34  
300 occurred in the same direction (83%,  $\rho = 0.62$ , p-value < 0.001) (**Fig 5D**), meaning that for that  
301 subset of transcripts, TDP-43 exerts a similar function in cells of neuronal and muscular  
302 background. We observed a higher frequency of frame-preservation among splicing events  
303 found to be controlled by TDP-43 in both cell lines (**Fig 5E**) along with better conservation of  
304 common TDP-43-regulated sequences across species (**Fig 5F**).

305 Alternative splicing occurs co-transcriptionally and the two mechanisms have been known to  
306 influence one another in a coordinated manner (Kornblihtt et al., 2013). In our case, however,  
307 only a small portion of transcripts undergoing TDP-43-dependent splicing additionally showed  
308 altered overall transcript abundance (21.9% and 21.2% in C2C12 and NSC34, respectively)  
309 (**Appendix Fig S3A**). At least in C2C12 cells, transcripts whose splicing was affected by loss  
310 of TDP-43 more often decreased in abundance, which might be indicative of nonsense  
311 mediated decay (**Appendix Fig S3B**). Finally, KEGG analysis performed on sets of  
312 differentially expressed or alternatively spliced genes suggest that TDP-43 knockdown could  
313 influence a particular molecular pathway such as axon guidance through change in transcript  
314 levels (DEG) or by the means of alternative splicing (**Appendix Fig S3C**).

315

### 316 **Novel TDP-43-regulated splicing events conserved between mouse and human**

317 While incorporation of exon 3 into mature *Poldip3* mRNA is regulated by TDP-43 in both  
318 mouse and human cells (Fiesel *et al.*, 2012), most of TDP-43's regulated splicing has shown to  
319 be highly species and even tissue-specific. We therefore investigated if any of commonly  
320 detected TDP-43 targets (**Fig 5A**) are (according to VastDB (Tapial *et al.*, 2017)) predicted to  
321 have an orthologous event in humans. Some TDP-43-mediated events found in mouse (*Rgp1*  
322 exon 3, *Sapcd2* exon 2, *Fam220a* exon 2) do not even have a corresponding orthologous exon  
323 in humans. For those with putative AS orthology (i.e., the presence of orthologous alternative  
324 exon in both species), we tested whether alternative exons were subject to TDP-43 control also  
325 in human cells. We silenced TDP-43 in two human cell lines representing neuronal and  
326 muscular cells – human neuroblastoma SH-SY5Y and rhabdomyosarcoma RH-30 (Reber *et al.*,  
327 2016) (**Fig 6A**), which resulted in exon skipping within *POLDIP3* (**Fig 6B**). Likewise, TDP-  
328 43 depletion led to enhanced inclusion of exon 19 in *PPFIBP1* and exon 23 of *ASAP2* but not

329 exon 5 of *TRAF7* or exon 3 of *NFYA* (**Fig 6C**). Although one study reported a great portion of  
330 TDP-43-controlled exons in mouse to have prior evidence of alternative splicing in humans  
331 (Polymenidou *et al*, 2011) we still lack understanding to what extent TDP-43 regulation of  
332 mRNA processing is conserved between species. Exon orthology (as assessed by sequence  
333 similarity) could not be predictive of AS conservation since exon incorporation into mature  
334 mRNA depends on the exonic sequence but also on *cis*-regulatory motives and *trans*-acting  
335 factors (Barbosa-Morais *et al*, 2012; Gueroussov *et al*, 2015; Raj & Blencowe, 2015). In fact,  
336 iCLIP performed in SH-SY5Y cells (Tollervey *et al*, 2011) identified direct TDP-43-binding  
337 sites in a close proximity of alternatively spliced exons within *PPFIBP1* and *ASAP2*, while that  
338 was not the case for *TRAF7* and *NFYA* (**Fig 6D**). This finding suggests that alternative exons  
339 of *PPFIBP1* and *ASAP2* found to be regulated by TDP-43 in mouse and human cells are most  
340 likely controlled by TDP-43 in a direct fashion by its binding to regulatory sequences  
341 neighbouring splice sites.

342

#### 343 **Altered splicing patterns imply on TDP-43 dysfunction in FTLD and IBM patients**

344 To explore if dysregulated alternative splicing could play a role in pathophysiology of TDP-43  
345 proteinopathies, we measured inclusion levels of TDP-43-mediated alternative exons in IBM  
346 muscles (**Fig 7A**) as well as in pathological brain regions of ALS and FTLD cases with reported  
347 TDP-43 pathology (ALS-TDP and FTLD-TDP) (**Fig 7B** and **7C**). Since neuroanatomical  
348 regions markedly vary with regards to splice isoform expression (**Appendix Fig S4A**), we  
349 considered each brain region independently rather than analysing them together. Tissue-  
350 specific accumulation of truncated *STMN2*, which has recently been described as a very good  
351 clinical marker of TDP-43 impairment (Prudencio *et al*, 2020; Melamed *et al*, 2019; Klim *et*  
352 *al*, 2019), in fact occurs in brain areas previously known to be affected by TDP-43 pathology.  
353 We thus investigated TDP-43-controlled splicing in the spinal cord (lumbar and cervical,  
354 respectively) and the motor cortex of ALS cases (**Fig 7B**), whereas frontal and temporal  
355 cortices were the site of interest for FTLD patients (**Fig 7C**).

356 The splicing signature examined herein consisted of six TDP-43-regulated alternative exons:  
357 *POLDIP3* exon 3 is consistently detected as a TDP-43-regulated splicing event; exon 15 of  
358 *TNIK* has been previously described as TDP-43 target and was also detected in C2C12, SH-  
359 SY5Y and RH-30 cells (**Appendix Fig S4B** and **S4C**); exon 19 of *PPFIBP1* and exon 23 of  
360 *ASAP2* are newly identified TDP-43 targets conserved across species; exons 12 and 13 of  
361 *TBC1D1* are detected to be controlled by TDP-43 in C2C12 cells and are associated with  
362 muscle differentiation (Bland *et al.*, 2010). The long *TBC1D1* isoform, which is dependent on

363 TDP-43, appears to be crucial in mature tissues (Bland et al., 2010) but not in undifferentiated  
364 cells (as thus it was not detected in undifferentiated NSC34, SH-SY5Y and RH-30 cells  
365 (**Appendix Fig S4B and S4C**)). As TDP-43 binding sites were indeed found in the proximity  
366 of these alternative exons (**Appendix Fig S4D**), inclusion levels of exons 12 and 13 of *TBC1D1*  
367 gene were investigated in mature tissues coming from patients.  
368 Interestingly, when we assessed inclusion levels of six TDP-43-controlled AS events in patient  
369 tissues, we got distinct patterns. For example, out of the six AS events, we only observed  
370 increased *ASAP2* exon 23 inclusion in IBM muscle relative to healthy controls (**Fig 7A**). In  
371 ALS cases, we detected significantly different inclusion of one exon (exon 19 of *PPFIBP1*) in  
372 the lumbar and cervical spinal cord but not in the motor cortex, while in motor cortex, we saw  
373 enhanced skipping of both alternative exons within *TBC1D1* (**Fig 7B**). Surprisingly enough,  
374 FTLN appears to be the disease, in which splicing of six alternative exons is most heavily  
375 perturbed. Multiple TDP-43-targeted exons show significantly altered inclusion in patients,  
376 both in frontal and temporal cortices (**Fig 7C**). Apart from that, some non-significant changes  
377 clearly show a trend towards altered exon inclusion in patients.  
378 At this point it is important to consider cell-type specific splicing activity of TDP-43 (**Fig 3A**),  
379 which makes it unlikely that upon TDP-43 malfunction splicing of the same transcripts would  
380 be altered across all cell types (**Fig 7D**). This being said, the scheme in **Fig 7D** summarizes  
381 splicing changes of six TDP-43-controlled exons detected in different tissues affected with  
382 TDP-43 pathology. The fact that splicing changes do not necessarily occur in the same  
383 direction as upon TDP-43 depletion in cell lines (as in the case of *ASAP2* and *TNIK*) again  
384 highlights the complexity of splicing control provided by TDP-43 that is generally acting  
385 within an interwoven network of splicing regulators. The same phenomenon (i.e., different  
386 directionality) was in fact observed when comparing the consequences TDP-43 depletion has  
387 on gene expression and alternative splicing *in vitro* using cell lines (**Fig 2C and 5D**).

388

## 389 DISCUSSION

390

391 TDP-43 inclusions represent the hallmark of ALS/FTLD (Arai *et al*, 2006; Neumann *et al*,  
392 2006) and are frequently recognized as a secondary pathology in other neurodegenerative  
393 disease (Hasegawa *et al*, 2007; Higashi *et al*, 2007). In recent years, great progress has been  
394 made in explaining how potential *loss-* and *gain-of-function* mechanisms contribute to the  
395 pathogenesis observed in the brain and spinal cord (Budini *et al*, 2015; Cascella *et al*, 2016;

396 Fratta *et al*, 2018). Nonetheless, a growing evidence of TDP-43 mis-localization and  
397 aggregation in tissues beyond the CNS has raised the possibility that TDP-43 dysfunction and  
398 consequently, impairment of RNA processing, might be deleterious for other tissues (Cortese  
399 *et al*, 2018, 2014).

400 To this date, cell- and tissue-characteristic molecular features of TDP-43 have seldom been  
401 investigated in parallel. Considering recent attention that TDP-43 has received in IBM and  
402 related pathologies (Harms *et al*, 2012; Salajegheh *et al*, 2009; Wehl *et al*, 2008; Yamashita  
403 *et al*, 2019), we therefore sought to fill this gap. The purpose of our study has been to further  
404 explicate the role of TDP-43 in different tissues to better understand its involvement in  
405 pathogenesis in cell types other than neurons, and to set the ground for development of potential  
406 therapeutic or biomarker strategies that focus on shared or specific disease mechanisms. We  
407 thus aimed to model *loss-of-function* effect in skeletal muscles vs. neurons and to focus on  
408 TDP-43-controlled alternative splicing (AS) events, as this is one of the best characterized  
409 features of this protein to date.

410 Although protein levels of TDP-43 itself are not different between C2C12 and NSC34, there  
411 is a tissue-characteristic expression of other RNA-binding proteins (e.g., those from *Elavl*,  
412 *Nova* and *Celf* families) that, like TDP-43, mediate RNA-related processes in a coordinated  
413 fashion. This result, together with differences in tissue-specific gene transcription levels, can  
414 presumably explain why there is little consistency across studies in identifying TDP-43-  
415 targeted transcripts (Buratti *et al*, 2013) and it clearly outlines the importance of cellular  
416 context in shaping the functional role of TDP-43. With regards to future TDP-43 investigations,  
417 our findings highlight the need to employ tissue models, which are most relevant for a certain  
418 condition. Most importantly, our results show that in the case of TDP-43 proteinopathies the  
419 knowledge acquired by studying neuronal cells could be translated to muscles only to a limited  
420 extent. Despite not investigated in this work, the same presumably applies for the interpretation  
421 of iCLIP results, in which TDP-43 binding should be always considered in the context of tissue  
422 characteristic environment, having in mind possible differences in binding behaviour of the  
423 protein across cell types that might affect splicing (Highley *et al*, 2014) and expression changes  
424 (Klim *et al*, 2019).

425 In some cases, our parallel study has given expected results. In NSC34 cells, for example, TDP-  
426 43 loss impacts expression of genes participating in pathways that provide elemental functions  
427 of neuronal cells, like *vesicle-mediated transport* and *regulation of postsynaptic membrane*  
428 *neurotransmitters*, which is perfectly in line with previous studies (Polymenidou *et al*, 2011;  
429 Tollervey *et al*, 2011). Similarly, the loss of TDP-43 in C2C12 cells impairs muscle

430 characteristic features, like *striated muscle development, muscle cell migration or regulation*  
431 *of muscle cell differentiation*, what has been functionally confirmed by others (Militello *et al*,  
432 2018; Vogler *et al*, 2018). However, we have also detected tissue-specific TDP-43-associated  
433 dysregulation of molecular functions that will probably deserve further investigation. For  
434 example, we found that in muscles TDP-43 mediates splicing of mRNAs encoding proteins  
435 implicated in DNA-related processes. This is a particularly interesting observation as DNA-  
436 related processes play an important role in muscle differentiation. In adult skeletal muscle,  
437 DNA and histone modifications participate in adaptive response to environmental stimuli,  
438 which challenge structural and metabolic demands and thus make skeletal muscle a very plastic  
439 tissue (Barrès *et al*, 2012; McGee & Hargreaves, 2011). Also the early commitment towards  
440 myogenic lineage involves epigenetic changes mediated by chromatin remodelling enzymes  
441 like histone deacetylases (HDACs), histone acetyltransferases (HATs) and histone  
442 methyltransferases (HMTs) (Guasconi & Puri, 2009). In keeping with this, *Dnmt3a*, *Dnmt3b*,  
443 *Hdac9*, *Hdac7*, *Prdm2* are just few of chromatin-modifying enzymes that underwent splicing  
444 changes upon TDP-43 depletion in C2C12 but not in NSC34 cells. Interestingly, telomere  
445 shortening was described in primary muscle cultures of sIBM patients suggesting premature  
446 senescence (Morosetti *et al*, 2010) and epigenetic changes have been described in congenital  
447 myopathies (Rokach *et al*, 2015). Therefore, the results obtained in C2C12 suggest another  
448 possible mechanism on how TDP-43 may control gene expression in muscle in an indirect  
449 fashion and eventually participate in disease. Recently, loss of TDP-43 was associated with  
450 increased genomic instability and R-loop formation (Giannini *et al*, 2020; Wood *et al*, 2020)  
451 possibly through mechanisms involving Poldip3, which has been shown to play a role in  
452 maintaining genome stability and preventing R-loop accumulation at sites of active replication  
453 (Björkman *et al*, 2020).

454 On the other hand, some molecular processes such as dysregulation of protein assembly and  
455 disposal; mitochondrial changes and apoptosis; as well as alterations in post-translational  
456 modifications seem to occur upon TDP-43 depletion in both cell types, which possibly links  
457 these pathological changes to TDP-43 dysfunction in both tissues. As we have drawn our  
458 conclusions based on the RNA-seq analysis, a crucial future step will be to functionally assess  
459 to what extent TDP-43 loss impacts the above-mentioned processes in each tissue. Ideally,  
460 functional experiments should be performed in the two cell types in parallel, as only such  
461 approach would allow a direct comparison of the regulatory role played by TDP-43 in each  
462 context and would answer the question, whether impairment of RNA processing is as central  
463 in IBM as it is in ALS.

464 Working with cell lines representing muscles (Militello *et al*, 2018; Vogler *et al*, 2018; Reber  
465 *et al*, 2016) and neurons (Colombrita *et al*, 2009; Fiesel *et al*, 2012; Highley *et al*, 2014; Nonaka  
466 *et al*, 2009; Tollervey *et al*, 2011) allowed us a direct (and unbiased) assessment of TDP-43  
467 activity across cell types. Mouse cell lines have been routinely employed to study TDP-43  
468 (Militello *et al.*, 2018; Vogler *et al.*, 2018). In our case, they were chosen over human cells due  
469 to the lack of an appropriate and well-established cell line derived from human skeletal muscle.  
470 With regards to the contribution of TDP-43 malfunction to human pathology, we observed that  
471 transcripts, whose splicing was commonly affected by TDP-43 loss in the two mouse cell lines,  
472 appear more likely to undergo TDP-43-regulated processing also in human cells. Herein, we  
473 show for the first time that alternative sequences regulated by TDP-43 in both cell lines are  
474 better conserved between species than those regulated in a cell type-specific manner.  
475 Nonetheless, a conservation of the alternative sequence itself cannot guarantee for splicing  
476 conservation. Thus, it would be extremely insightful to investigate conservation of TDP-43-  
477 regulated splicing between human and mice on a transcriptome-wide level by actual  
478 sequencing experiment (rather than comparing gene sequences as such), possibly using  
479 analogous tissues (Cardoso-Moreira *et al*, 2020). A good example of commonly regulated  
480 event is skipping of exon 3 within *POLDIP3*, the regulation of which is conserved between  
481 mouse in humans (Fiesel *et al*, 2012; Shiga *et al*, 2012; Polymenidou *et al*, 2011) and has made  
482 it the most consistently detected event across studies. In this study, however, we identified two  
483 novel targets, *ASAP2* and *PPFIBP1*, and show that they indeed undergo TDP-43-dependent  
484 splicing in all (mouse and human) cell lines tested. These additional findings could be of  
485 interest to identify common endpoints of mouse and human disease models that could then be  
486 used to monitor the efficiency of eventual novel therapeutic approaches or to follow disease  
487 course/onset.

488 Finally, as a *proof-of-principle*, we show that splicing alterations of TDP-43-dependent  
489 transcripts does in fact take place in different tissues (i.e., skeletal muscle and certain brain  
490 regions) affected by TDP-43 pathology. While expression levels of a given transcript heavily  
491 vary between individuals and, in our experience, seem to be influenced by experimental  
492 procedure itself (how and when biopsies are taken), the relative abundance of characteristic  
493 isoforms appears to be a more reliable readout. Considering cell-type-specific activity of TDP-  
494 43, it is reasonable to deduce that splicing of other TDP-43-controlled transcripts would be  
495 affected in the skeletal muscle and in neurons. In conclusion, we show that splicing changes as  
496 such indeed represent a robust indication of pathological conditions both in the skeletal muscle  
497 of IBM patients and in the brain of individuals affected with FTL.

498

## 499 MATERIALS AND METHODS

500

### 501 **Cell culture**

502 C2C12 immortalized mouse myoblasts (ECACC), SH-SY5Y human neuroblastoma (ECACC)  
503 and RH-30 human rhabdomyosarcoma (kindly donated by Marc-David Ruepp) were  
504 maintained in DMEM (Thermo Fisher Scientific), supplemented with 10% FBS (Thermo  
505 Fisher Scientific) and antibiotics/antimycotics (Sigma-Aldrich) under standard conditions.  
506 NSC34 motoneuron-like mouse hybrid cell line (available in house) was cultured in DMEM  
507 (Thermo Fisher Scientific) with 5% FBS (Sigma-Aldrich) and antibiotics/antimycotics (Sigma-  
508 Aldrich). All experiments were performed with cells of similar passage number ( $\pm 2$ ). To  
509 silence TDP-43 in C2C12 and NSC34 cells, 40 nM of siTDP (mouse siTDP 5'-  
510 CGAUGAACCCAUGAAAUA-3', Sigma-Aldrich) or non-targeting siLUC (5'-  
511 UAAGGCUAUGAAGAGAUAC-3', Sigma-Aldrich) were mixed with 54  $\mu$ l of RNAiMAX  
512 (Invitrogen) following the manufacturer's reverse transfection protocol and applied to cells 700  
513 000 seeded in a 10 cm dish. 48 h later, transfected cells were collected for subsequent analysis.  
514 The same reagent was used to silence TDP-43 in human SH-SY5Y and RH-30 cells. 400 000  
515 RH-30 were seeded in a 60 cm dish, reversely transfected (human siTDP 5'-  
516 GCAAAGCCAAGAUGAGCCU-3', Sigma-Aldrich or siLUC) and harvested 48 h later. To  
517 deplete TDP-43 in SH-SY5Y cells, 1 000 000 cells were seeded in a 6 cm dish and reversely  
518 transfected. After 48 h, they were transfected again and harvested 48 h later.

519

### 520 **Western blotting**

521 Whole-cell extracts were resuspended in PBS in the presence of protease inhibitor and  
522 sonicated. 15  $\mu$ g of protein sample were separated on a 10% Bis-Tris gels (Invitrogen) and  
523 transferred to the nitrocellulose membrane (Invitrogen). The membrane was blocked in 4%  
524 milk-PBST and proteins were stained using the following antibodies: anti-TDP-43 (rabbit,  
525 Proteintech, 1:1000), anti-GAPDH (rabbit, Proteintech, 1:1000), anti-HSP70 (rat, EnzoLife  
526 Science, 1:1000), anti-tubulin (mouse, available inhouse, 1:10000) and HRP-conjugated  
527 secondary antibodies anti-rabbit (goat, Dako, 1:2000), anti-mouse (goat, Dako, 1:2000), anti-  
528 rat (rabbit, Dako, 1:2000). Image acquisition and result quantification were conducted using  
529 Alliance Q9 Advanced Chemiluminescence Imager (UviTech).



530

### 531 **RNA extraction, RT-PCR**

532 Total RNA was isolated using standard phenol-chlorophorm extraction. Only undegraded (RIS  
533 > 8) RNA of high purity ( $A_{260}/A_{230}$  and  $A_{260}/A_{280} > 1.8$ ) was taken for subsequent analysis. 500  
534 ng of RNA was reversely transcribed using random primers (Eurofins) and Moloney murine  
535 leukaemia virus reverse transcriptase (M-MLV, Invitrogen) according to manufacturer's  
536 instructions.

537

### 538 **Splicing-sensitive PCR and qPCR**

539 For detection of alternatively spliced mRNAs, PCR primers were designed complementary to  
540 constitutive exonic regions flanking the predicted alternatively spliced cassette exon. PCR mix  
541 was prepared using gene-specific primers (0.6  $\mu$ M, Sigma, primer sequences in the **Appendix**  
542 **Table S1** and **S2**) and TAQ DNA polymerase (Biolabs or Roche) according to manufacturer's  
543 instructions and subjected to 35-45 cycles long thermal protocol optimized for each primer  
544 pair. PCR products were separated by capillary electrophoresis (DNA screening cartridge,  
545 Qiaxcel) and splicing transitions were quantified using Qiaxcel software (QIAxcel ScreenGel  
546 (v1.4.0)). Exon inclusion was calculated by the software. Percentage of the inclusion (Inc. %)  
547 reports the area under the curve of the peak representing the longer (inclusion) splicing isoform.  
548 For assessment of transcript levels, real-time quantitative PCR was performed using PowerUp  
549 SYBR Green master mix (Applied Biosystems) and gene-specific primers (primer sequences  
550 in the **Appendix Table S3**). cDNA was subjected to 45 cycles of the following thermal  
551 protocol: 95 °C for 3 min, 95 °C for 10 s, 65 °C for 30 s, 95 °C for 10 s, 65 °C for 1 s. Relative  
552 gene expression levels were determined using QuantStudio design and analysis software  
553 (Thermofisher Scientific (v1.5.1)) always comparing treated samples (siTDP) with their direct  
554 controls (siLUC) normalized against *Gapdh*. p-values were calculated using one-tailed paired  
555 t-test as qPCR was conducted to validate expression changes detected by RNA-seq.

556

### 557 **RNA-seq**

558 Both polyA cDNA library generation and RNA-seq were performed by Novogene (Beijing,  
559 China). cDNA libraries with insert length of 250-300 bp were generated using NEB NextUltra  
560 RNA Library Prep Kit. Sequencing was conducted on Illumina with paired-end 150 bp (PE  
561 150) strategy.

562

## 563 **Read mapping**

564 Sequencing quality control and filtering were performed to prune reads with average Phred  
565 score (Qscore) below 20 across 50% of bases, as well as those with more than 0.1% of  
566 undetermined (N) ones. Obtained reads were aligned to the mouse genome GRCm38 (mm10)  
567 using the Spliced Transcripts Alignment to a Reference (STAR) software (v2.5) (Dobin *et al*,  
568 2013), an RNA-seq data aligner that utilizes Maximal Mappable Prefix (MMP) strategy to  
569 account for the exon junction problem.

570

## 571 **Quantification of gene expression level**

572 Counting of reads mapped to each gene was performed using HTSeq (v0.6.1) (Anders *et al*,  
573 2015). Raw read counts together with respective gene length were used to calculate Fragments  
574 Per Kilobase of transcript sequence per Millions base pairs sequenced (FPKM). In contrast to  
575 read counts, FPKMs account for sequencing depth and gene length on counting of fragments  
576 (Mortazavi *et al*, 2008) and are frequently used to estimate gene expression levels.

577

## 578 **Differential expression analysis**

579 Differential gene expression (DEG) analysis of two conditions was performed using the  
580 *DESeq2* R package (v2\_1.6.3) (Anders & Huber, 2010), a tool that utilizes negative binomial  
581 distribution model to account for variance-mean dependence in count data and tests for  
582 differential expression (Love *et al*, 2014). Three biological replicates were included per cell  
583 type and condition, in control (siLUC) and TDP-43-silenced (siTDP) cells. Read count matrix  
584 was pre-filtered by removing rows with row sum below one. Multiple testing adjustments were  
585 performed using Benjamini and Hochberg's approach to control for the false discovery rate  
586 (FDR). Transcripts with  $p_{adj} < 0.05$  were considered as differentially expressed.

587 Differentially expressed genes identified in both cell lines under different experimental  
588 conditions were hierarchically clustered based on  $\log_{10}(\text{FPKM}+1)$  and visualized with  
589 *pheatmap* R package (v1.0.12) (Kolde, 2019). Further, distance between silenced and control  
590 samples of each cell line was illustrated with principal component analysis (PCA), using the R  
591 function "*prcomp*" (R Core Team, 2019). Differences in gene expression levels  
592 ( $\log_{10}(\text{FPKM}+1)$ ) between cell lines were tested for significance using Wilcoxon signed-rank  
593 test.

594

## 595 **Alternative splicing analysis**

596 Five major types of alternative splicing events – skipped exons (SE), mutually exclusive exons  
597 (MXE), alternative 5' and 3' splice sites (A5'SS and A3'SS) and intron retention (RI) - were  
598 detected and analysed by Novogene using replicate multivariate analysis of transcript splicing  
599 (rMATS) software (v3.2.1) (Shen *et al*, 2014). Every alternative splicing event can produce  
600 exactly two isoforms. Each isoform is adjusted for its effective length before calculating the  
601 ratio of two isoforms and testing significance of differential splicing between two conditions.  
602 Multiple testing was corrected using Benjamini and Hochberg's method. Splicing events  
603 having FDR < 0.01 were considered significant irrespective of  $\Delta$ PSI.

604 Alternatively (for analysis of cryptic splicing and patient's data (**Fig 3D** and **Fig 7** and  
605 **Appendix fig S4D**)), differential splicing analysis was performed using MAJIQ (v2.1) and the  
606 GRCm38 as a reference genome as previously described elsewhere (Brown *et al*, 2021).

607

## 608 **Enrichment analysis**

609 Gene Ontology GO (Ashburner *et al*, 2000) and Kyoto Encyclopaedia of Genes and Genomes  
610 databases KEGG (Kanehisa, 2000) are widely used in gene enrichment analysis to classify list  
611 of individual genes based on their expression pattern, or other similar feature, with the aim to  
612 predict dysregulated biological processes, functions and pathways or any other general trend  
613 within a subset of data (Yu *et al*, 2012). In this study, GO enrichment and KEGG analysis were  
614 conducted in R, using *clusterProfiler* package (v3.14.3) (Yu *et al*, 2012) either on the set of  
615 differentially expressed genes ( $p_{adj} < 0.05$ ) or alternatively spliced genes (FDR < 0.01), if not  
616 stated otherwise. Additionally, GO enrichment analysis was conducted using less stringent  
617 threshold for inclusion of alternatively spliced genes (where we considered genes with non-  
618 corrected p-value < 0.01 instead of FDR < 0.01). Genes of a particular dataset were assigned  
619 Entrez gene identifiers from Bioconductor mouse annotation package *org.Mm.eg.db* (v3.10.0).  
620 Enrichment test for GO terms and KEGG pathways were calculated based on hypergeometric  
621 distribution. The resulting GO terms/KEGG pathways were considered significant after  
622 applying multiple testing corrections with Benjamini-Hochberg method ( $p_{adj} < 0.05$ ).  
623 Subsequently, significant GO terms (category: biological process) were functionally grouped  
624 or manually edited depending on the underlying biological question.

625

## 626 **Conservation analysis**

627 Gene/exon conservation analysis within mouse (mm10) was performed by calculating phyloP  
628 (phylogenetic p-values) scores, i.e., per base conservation scores, generated from aligned  
629 genomic sequences of multiple species (Pollard *et al*, 2010).

630 For each differentially expressed gene, the average *per gene* phyloP score was computed with  
631 bigWigSummary (UCSC) (Kent *et al*, 2010). To calculate phyloP scores of TDP-43-regulated  
632 alternative sequences (hereafter referred to as *per exon* phyloP score), we considered TDP-43-  
633 regulated sequences of all event types. Those include A'3SS and A'5SS (long and short exon),  
634 retained introns and cassette exons (SE, the 1<sup>st</sup> and the 2<sup>nd</sup> exon of MXE).

635

## 636 **Patient samples**

637 The NYGC ALS cohort has previously been detailed elsewhere (Prudencio *et al*, 2020; Brown  
638 *et al*, 2021). Herein, we only considered ALS and FTLN patients with TDP-43 pathology  
639 (ALS-TDP and FTLN-TDP) and healthy controls while excluding ALS with *SOD1* mutations  
640 of FTLN patients without TDP-43 inclusions.

641 Muscle biopsies (vastus lateralis or biceps) were obtained from 4 patient diagnosed with IBM  
642 according to the Griggs criteria (Griggs *et al*, 1995) and 4 healthy controls. Participants were  
643 investigated for cramps or fatigue, they underwent regular examination, neurophysiology tests  
644 and histological examinations. IBM biopsies were taken from moderately affected muscles and  
645 routinely investigated for histological and immunohistochemistry features. In case muscle  
646 fibrosis was present, it did not compromise a definite pathologic diagnosis. Basic demographic  
647 features of all participants are summarised in **Appendix Table S4**. Biopsies were stored at 80  
648 °C. Institutional board reviewed the study and ethical approval was obtained.

649 Sample processing, library preparation, and RNA-seq quality control have already been  
650 described elsewhere (Brown *et al*, 2021).

651

## 652 **DATA AVAILABILITY**

653  
654 Datasets generated for this study are deposited in NCBI's Gene Expression Omnibus and are  
655 accessible through GEO Series accession number GSE171714. [The following secure token  
656 has been created to allow review of record GSE171714 while it remains in private status:  
657 ibkdwqwkwxjuvbaj].

658

## 659 ACKNOWLEDGEMENTS

660

661 We thank Marc-David Ruepp (King's College London) for providing RH-30 cells and Robert  
662 Bakarić for his kind assistance with the conservation analysis.

663 We would also like to thank the Target ALS Human Postmortem Tissue Core (New York  
664 Genome Center for Genomics of Neurodegenerative Disease, Amyotrophic Lateral Sclerosis  
665 Association) for providing post-mortem brain samples, patients and their families who donated  
666 those samples. See supplemental acknowledgments (**Appendix Table S5**) for the complete list  
667 of the NYGC ALS Consortium members. IBM muscle biopsies were kindly provided by the  
668 Bank of muscle tissue, peripheral nerve, DNA and Cell Culture, a member of Telethon network  
669 of Genetic biobanks, at Fondazione IRCCS Ca' Granda, Ospedale Maggiore Policlinico,  
670 Milano, Italy and from the Laboratory of Muscle Histopathology and Molecular Biology at  
671 IRCCS Policlinico San Donato, San Donato Milanese, Italy.

672 This research was supported by the AriSLA grant PathensTDP to EB and by the European  
673 Reference Network for Neuromuscular Diseases to MM and MR. Consortium activities were  
674 supported by the ALS Association (15-LGCA-234) and the Tow Foundation. GM was  
675 supported by Fondazione Malattie Miotoniche, Milan, Italy. Andrea Cortese would like to  
676 thank Medical Research Council (MR/T001712/1), Cariplo foundation, the Italian Ministry of  
677 Health (Ricerca Corrente 2018–2019), the Inherited Neuropathy Consortium and the  
678 Fondazione Regionale per la Ricerca Biomedica for the grant support.

679

## 680 AUTHOR CONTRIBUTIONS

681

682 UŠ and YA conducted experiments; UŠ, NŠ, ALB and MR analysed the data; UŠ and EB  
683 designed the study; HP provided patient data collected by the NYGC ALS consortium (see the  
684 complete list of members in the supplemental acknowledgments **Appendix Table S5**); AC,  
685 CC, EB, RC, GB, MR, MM provided IBM patient samples; PF, MS and EB supervised the  
686 study; UŠ and EB wrote the manuscript with contributions of other authors.

687

## 688 CONFLICT OF INTEREST

689

690 The authors declare that there is no conflict of interest.

691

## 692 REFERENCES

693

694 Anders S & Huber W (2010) Differential expression analysis for sequence count data. *Genome*  
695 *Biol* 11: R106

696 Anders S, Pyl PT & Huber W (2015) HTSeq-a Python framework to work with high-  
697 throughput sequencing data. *Bioinformatics* 31: 166–169

698 Appocher C, Mohagheghi F, Cappelli S, Stuani C, Romano M, Feiguin F & Buratti E (2017)  
699 Major hnRNP proteins act as general TDP-43 functional modifiers both in *Drosophila*  
700 and human neuronal cells. *Nucleic Acids Research* 45: 8026–8045

701 Arai T, Hasegawa M, Akiyama H, Ikeda K, Nonaka T, Mori H, Mann D, Tsuchiya K, Yoshida  
702 M, Hashizume Y, *et al* (2006) TDP-43 is a component of ubiquitin-positive tau-  
703 negative inclusions in frontotemporal lobar degeneration and amyotrophic lateral  
704 sclerosis. *Biochemical and Biophysical Research Communications* 351: 602–611

705 Arnold ES, Ling S-C, Huelga SC, Lagier-Tourenne C, Polymenidou M, Ditsworth D,  
706 Kordasiewicz HB, McAlonis-Downes M, Platoshyn O, Parone PA, *et al* (2013) ALS-  
707 linked TDP-43 mutations produce aberrant RNA splicing and adult-onset motor neuron  
708 disease without aggregation or loss of nuclear TDP-43. *Proceedings of the National*  
709 *Academy of Sciences* 110: E736–E745

710 Ashburner M, Ball CA, Blake JA, Botstein D, Butler H, Cherry JM, Davis AP, Dolinski K,  
711 Dwight SS, Eppig JT, *et al* (2000) Gene Ontology: tool for the unification of biology.  
712 *Nat Genet* 25: 25–29

713 Askanas V, Engel WK & Nogalska A (2012) Pathogenic Considerations in Sporadic Inclusion-  
714 Body Myositis, a Degenerative Muscle Disease Associated With Aging and  
715 Abnormalities of Myoproteostasis. *J Neuropathol Exp Neurol* 71: 680–693

716 Askanas V, Engel WK & Nogalska A (2015) Sporadic inclusion-body myositis: A  
717 degenerative muscle disease associated with aging, impaired muscle protein  
718 homeostasis and abnormal mitophagy. *Biochimica et Biophysica Acta (BBA) -*  
719 *Molecular Basis of Disease* 1852: 633–643

720 Barbosa-Morais NL, Irimia M, Pan Q, Xiong HY, Gueroussov S, Lee LJ, Slobodeniuc V,  
721 Kutter C, Watt S, Colak R, *et al* (2012) The Evolutionary Landscape of Alternative  
722 Splicing in Vertebrate Species. *Science* 338: 1587–1593

723 Barrès R, Yan J, Egan B, Treebak JT, Rasmussen M, Fritz T, Caidahl K, Krook A, O’Gorman  
724 DJ & Zierath JR (2012) Acute Exercise Remodels Promoter Methylation in Human  
725 Skeletal Muscle. *Cell Metabolism* 15: 405–411

726 Birsa N, Bentham MP & Fratta P (2020) Cytoplasmic functions of TDP-43 and FUS and their  
727 role in ALS. *Seminars in Cell & Developmental Biology* 99: 193–201

- 728 Björkman A, Johansen SL, Lin L, Schertzer M, Kanellis DC, Katsori A-M, Christensen ST,  
729 Luo Y, Andersen JS, Elsässer SJ, *et al* (2020) Human RTEL1 associates with Poldip3  
730 to facilitate responses to replication stress and R-loop resolution. *Genes Dev* 34: 1065–  
731 1074
- 732 Bland CS, Wang ET, Vu A, David MP, Castle JC, Johnson JM, Burge CB & Cooper TA (2010)  
733 Global regulation of alternative splicing during myogenic differentiation. *Nucleic Acids*  
734 *Research* 38: 7651–7664
- 735 Brown A-L, Wilkins OG, Keuss MJ, Hill SE, Zanovello M, Lee WC, Lee FCY, Masino L, Qi  
736 YA, Bryce-Smith S, *et al* (2021) Common ALS/FTD risk variants in *UNC13A*  
737 exacerbate its cryptic splicing and loss upon TDP-43 mislocalization Neuroscience  
738 [PREPRINT]
- 739 Budini M & Buratti E (2011) TDP-43 Autoregulation: Implications for Disease. *J Mol*  
740 *Neurosci* 45: 473–479
- 741 Budini M, Romano V, Quadri Z, Buratti E & Baralle FE (2015) TDP-43 loss of cellular  
742 function through aggregation requires additional structural determinants beyond its C-  
743 terminal Q/N prion-like domain. *Human Molecular Genetics* 24: 9–20
- 744 Buratti E (2015) Functional Significance of TDP-43 Mutations in Disease. In *Advances in*  
745 *Genetics* pp 1–53. Elsevier
- 746 Buratti E (2018) TDP-43 post-translational modifications in health and disease. *Expert Opinion*  
747 *on Therapeutic Targets* 22: 279–293
- 748 Buratti E & Baralle FE (2012) TDP-43: gumming up neurons through protein–protein and  
749 protein–RNA interactions. *Trends in Biochemical Sciences* 37: 237–247
- 750 Buratti E, Romano M & Baralle FE (2013) TDP-43 high throughput screening analyses in  
751 neurodegeneration: Advantages and pitfalls. *Molecular and Cellular Neuroscience* 56:  
752 465–474
- 753 Cabili MN, Trapnell C, Goff L, Koziol M, Tazon-Vega B, Regev A & Rinn JL (2011)  
754 Integrative annotation of human large intergenic noncoding RNAs reveals global  
755 properties and specific subclasses. *Genes & Development* 25: 1915–1927
- 756 Cappelli S, Romano M & Buratti E (2018) Systematic Analysis of Gene Expression Profiles  
757 Controlled by hnRNP Q and hnRNP R, Two Closely Related Human RNA Binding  
758 Proteins Implicated in mRNA Processing Mechanisms. *Front Mol Biosci* 5: 79
- 759 Cardoso-Moreira M, Sarropoulos I, Velten B, Mort M, Cooper DN, Huber W & Kaessmann H  
760 (2020) Developmental Gene Expression Differences between Humans and Mammalian  
761 Models. *Cell Reports* 33: 108308
- 762 Cascella R, Capitini C, Fani G, Dobson CM, Cecchi C & Chiti F (2016) Quantification of the  
763 Relative Contributions of Loss-of-function and Gain-of-function Mechanisms in TAR  
764 DNA-binding Protein 43 (TDP-43) Proteinopathies. *J Biol Chem* 291: 19437–19448

- 765 Colombrita C, Zennaro E, Fallini C, Weber M, Sommacal A, Buratti E, Silani V & Ratti A  
766 (2009) TDP-43 is recruited to stress granules in conditions of oxidative insult. *Journal*  
767 *of Neurochemistry* 111: 1051–1061
- 768 Cortese A, Laurà M, Casali C, Nishino I, Hayashi YK, Magri S, Taroni F, Stuani C, Saveri P,  
769 Moggio M, *et al* (2018) Altered TDP-43-dependent splicing in *HSPB8* -related distal  
770 hereditary motor neuropathy and myofibrillar myopathy. *Eur J Neurol* 25: 154–163
- 771 Cortese A, Plagnol V, Brady S, Simone R, Lashley T, Acevedo-Arozena A, de Silva R,  
772 Greensmith L, Holton J, Hanna MG, *et al* (2014) Widespread RNA metabolism  
773 impairment in sporadic inclusion body myositis TDP43-proteinopathy. *Neurobiology*  
774 *of Aging* 35: 1491–1498
- 775 De Conti L, Akinyi MV, Mendoza-Maldonado R, Romano M, Baralle M & Buratti E (2015)  
776 TDP-43 affects splicing profiles and isoform production of genes involved in the  
777 apoptotic and mitotic cellular pathways. *Nucleic Acids Res* 43: 8990–9005
- 778 Dobin A, Davis CA, Schlesinger F, Drenkow J, Zaleski C, Jha S, Batut P, Chaisson M &  
779 Gingeras TR (2013) STAR: ultrafast universal RNA-seq aligner. *Bioinformatics* 29:  
780 15–21
- 781 Ederle H & Dormann D (2017) TDP-43 and FUS en route from the nucleus to the cytoplasm.  
782 *FEBS Lett* 591: 1489–1507
- 783 Fiesel FC, Weber SS, Supper J, Zell A & Kahle PJ (2012) TDP-43 regulates global translational  
784 yield by splicing of exon junction complex component SKAR. *Nucleic Acids Research*  
785 40: 2668–2682
- 786 Fratta P, Sivakumar P, Humphrey J, Lo K, Ricketts T, Oliveira H, Brito-Armas JM, Kalmar B,  
787 Ule A, Yu Y, *et al* (2018) Mice with endogenous TDP -43 mutations exhibit gain of  
788 splicing function and characteristics of amyotrophic lateral sclerosis. *EMBO J* 37
- 789 Freibaum BD, Chitta RK, High AA & Taylor JP (2010) Global Analysis of TDP-43 Interacting  
790 Proteins Reveals Strong Association with RNA Splicing and Translation Machinery. *J*  
791 *Proteome Res* 9: 1104–1120
- 792 Giannini M, Bayona-Feliu A, Sproviero D, Barroso SI, Cereda C & Aguilera A (2020) TDP-  
793 43 mutations link Amyotrophic Lateral Sclerosis with R-loop homeostasis and R loop-  
794 mediated DNA damage. *PLoS Genet* 16: e1009260
- 795 Green CJ, Gazzara MR & Barash Y (2018) MAJIQ-SPEL: web-tool to interrogate classical  
796 and complex splicing variations from RNA-Seq data. *Bioinformatics* 34: 300–302
- 797 Griggs RC, Askanas V, DiMauro S, Engel A, Karpati G, Mendell JR & Rowland LP (1995)  
798 Inclusion body myositis and myopathies. *Ann Neurol* 38: 705–713
- 799 Guasconi V & Puri PL (2009) Chromatin: the interface between extrinsic cues and the  
800 epigenetic regulation of muscle regeneration. *Trends in Cell Biology* 19: 286–294
- 801 Guerousov S, Gonatopoulos-Pournatzis T, Irimia M, Raj B, Lin Z-Y, Gingras A-C &  
802 Blencowe BJ (2015) An alternative splicing event amplifies evolutionary differences  
803 between vertebrates. *Science* 349: 868–873



- 804 Harms MB, Sommerville RB, Allred P, Bell S, Ma D, Cooper P, Lopate G, Pestronk A, Weihl  
805 CC & Baloh RH (2012) Exome sequencing reveals DNAJB6 mutations in dominantly-  
806 inherited myopathy. *Ann Neurol* 71: 407–416
- 807 Hasegawa M, Arai T, Akiyama H, Nonaka T, Mori H, Hashimoto T, Yamazaki M & Oyanagi  
808 K (2007) TDP-43 is deposited in the Guam parkinsonism-dementia complex brains.  
809 *Brain* 130: 1386–1394
- 810 Higashi S, Iseki E, Yamamoto R, Minegishi M, Hino H, Fujisawa K, Togo T, Katsuse O,  
811 Uchikado H, Furukawa Y, *et al* (2007) Concurrence of TDP-43, tau and  $\alpha$ -synuclein  
812 pathology in brains of Alzheimer's disease and dementia with Lewy bodies. *Brain*  
813 *Research* 1184: 284–294
- 814 Highley JR, Kirby J, Jansweijer JA, Webb PS, Hewamadduma CA, Heath PR, Higginbottom  
815 A, Raman R, Ferraiuolo L, Cooper-Knock J, *et al* (2014) Loss of nuclear TDP-43 in  
816 amyotrophic lateral sclerosis (ALS) causes altered expression of splicing machinery  
817 and widespread dysregulation of RNA splicing in motor neurones: Amyotrophic lateral  
818 sclerosis, TDP-43 and mRNA splicing. *Neuropathol Appl Neurobiol* 40: 670–685
- 819 Irimia M, Weatheritt RJ, Ellis JD, Parikshak NN, Gonatopoulos-Pournatzis T, Babor M,  
820 Quesnel-Vallières M, Tapial J, Raj B, O'Hanlon D, *et al* (2014) A Highly Conserved  
821 Program of Neuronal Microexons Is Misregulated in Autistic Brains. *Cell* 159: 1511–  
822 1523
- 823 Jeong YH, Ling JP, Lin SZ, Donde AN, Braunstein KE, Majounie E, Traynor BJ, LaClair KD,  
824 Lloyd TE & Wong PC (2017) Tdp-43 cryptic exons are highly variable between cell  
825 types. *Mol Neurodegeneration* 12: 13
- 826 Jiang C, Li Y, Zhao Z, Lu J, Chen H, Ding N, Wang G, Xu J & Li X (2016) Identifying and  
827 functionally characterizing tissue-specific and ubiquitously expressed human  
828 lncRNAs. *Oncotarget* 7: 7120–7133
- 829 Kanehisa M (2000) KEGG: Kyoto Encyclopedia of Genes and Genomes. *Nucleic Acids*  
830 *Research* 28: 27–30
- 831 Kent WJ, Zweig AS, Barber G, Hinrichs AS & Karolchik D (2010) BigWig and BigBed:  
832 enabling browsing of large distributed datasets. *Bioinformatics* 26: 2204–2207
- 833 Klim JR, Williams LA, Limone F, Guerra San Juan I, Davis-Dusenbery BN, Mordes DA,  
834 Burberry A, Steinbaugh MJ, Gamage KK, Kirchner R, *et al* (2019) ALS-implicated  
835 protein TDP-43 sustains levels of STMN2, a mediator of motor neuron growth and  
836 repair. *Nat Neurosci* 22: 167–179
- 837 Kolde R (2019) pheatmap: Pretty Heatmaps
- 838 Lagier-Tourenne C, Polymenidou M, Hutt KR, Vu AQ, Baughn M, Huelga SC, Clutario KM,  
839 Ling S-C, Liang TY, Mazur C, *et al* (2012) Divergent roles of ALS-linked proteins  
840 FUS/TLS and TDP-43 intersect in processing long pre-mRNAs. *Nat Neurosci* 15:  
841 1488–1497
- 842 Love MI, Huber W & Anders S (2014) Moderated estimation of fold change and dispersion  
843 for RNA-seq data with DESeq2. *Genome Biol* 15: 550

- 844 Ludwig N, Leidinger P, Becker K, Backes C, Fehlmann T, Pallasch C, Rheinheimer S, Meder  
845 B, Stähler C, Meese E, *et al* (2016) Distribution of miRNA expression across human  
846 tissues. *Nucleic Acids Res* 44: 3865–3877
- 847 McGee SL & Hargreaves M (2011) Histone modifications and exercise adaptations. *Journal*  
848 *of Applied Physiology* 110: 258–263
- 849 Mehmood A, Laiho A, Venäläinen MS, McGlinchey AJ, Wang N & Elo LL (2020) Systematic  
850 evaluation of differential splicing tools for RNA-seq studies. *Briefings in*  
851 *Bioinformatics* 21: 2052–2065
- 852 Melamed Z, López-Erauskin J, Baughn MW, Zhang O, Drenner K, Sun Y, Freyermuth F,  
853 McMahan MA, Beccari MS, Artates JW, *et al* (2019) Premature polyadenylation-  
854 mediated loss of stathmin-2 is a hallmark of TDP-43-dependent neurodegeneration. *Nat*  
855 *Neurosci* 22: 180–190
- 856 Mele M, Ferreira PG, Reverter F, DeLuca DS, Monlong J, Sammeth M, Young TR, Goldmann  
857 JM, Pervouchine DD, Sullivan TJ, *et al* (2015) The human transcriptome across tissues  
858 and individuals. *Science* 348: 660–665
- 859 Militello G, Hosen MR, Ponomareva Y, Gellert P, Weirick T, John D, Hindi SM, Mamchaoui  
860 K, Mouly V, Döring C, *et al* (2018) A novel long non-coding RNA Myolinc regulates  
861 myogenesis through TDP-43 and Filip1. *Journal of Molecular Cell Biology* 10: 102–  
862 117
- 863 Mohagheghi F, Prudencio M, Stuanı C, Cook C, Jansen-West K, Dickson DW, Petrucelli L &  
864 Buratti E (2016) TDP-43 functions within a network of hnRNP proteins to inhibit the  
865 production of a truncated human SORT1 receptor. *Hum Mol Genet* 25: 534–545
- 866 Morosetti R, Broccolini A, Sancricca C, Gliubizzi C, Gidaro T, Tonali PA, Ricci E & Mirabella  
867 M (2010) Increased aging in primary muscle cultures of sporadic inclusion-body  
868 myositis. *Neurobiology of Aging* 31: 1205–1214
- 869 Mortazavi A, Williams BA, McCue K, Schaeffer L & Wold B (2008) Mapping and quantifying  
870 mammalian transcriptomes by RNA-Seq. *Nat Methods* 5: 621–628
- 871 Neumann M, Sampathu DM, Kwong LK, Truax AC, Micsenyi MC, Chou TT, Bruce J, Schuck  
872 T, Grossman M, Clark CM, *et al* (2006) Ubiquitinated TDP-43 in Frontotemporal  
873 Lobar Degeneration and Amyotrophic Lateral Sclerosis. *Science* 314: 130–133
- 874 Nonaka T, Arai T, Buratti E, Baralle FE, Akiyama H & Hasegawa M (2009) Phosphorylated  
875 and ubiquitinated TDP-43 pathological inclusions in ALS and FTL-D-U are  
876 recapitulated in SH-SY5Y cells. *FEBS Letters* 583: 394–400
- 877 Pollard KS, Hubisz MJ, Rosenbloom KR & Siepel A (2010) Detection of nonneutral  
878 substitution rates on mammalian phylogenies. *Genome Research* 20: 110–121
- 879 Polymenidou M, Lagier-Tourenne C, Hutt KR, Huelga SC, Moran J, Liang TY, Ling S-C, Sun  
880 E, Wancewicz E, Mazur C, *et al* (2011) Long pre-mRNA depletion and RNA  
881 missplicing contribute to neuronal vulnerability from loss of TDP-43. *Nat Neurosci* 14:  
882 459–468

- 883 Prpar Mihevc S, Baralle M, Buratti E & Rogelj B (2016) TDP-43 aggregation mirrors TDP-43  
884 knockdown, affecting the expression levels of a common set of proteins. *Sci Rep* 6:  
885 33996
- 886 Prudencio M, Humphrey J, Pickles S, Brown A-L, Hill SE, Kachergus JM, Shi J, Heckman  
887 MG, Spiegel MR, Cook C, *et al* (2020) Truncated stathmin-2 is a marker of TDP-43  
888 pathology in frontotemporal dementia. *Journal of Clinical Investigation* 130: 6080–  
889 6092
- 890 Prudencio M, Jansen-West KR, Lee WC, Gendron TF, Zhang Y-J, Xu Y-F, Gass J, Stuani C,  
891 Stetler C, Rademakers R, *et al* (2012) Misregulation of human sortilin splicing leads to  
892 the generation of a nonfunctional progranulin receptor. *Proceedings of the National*  
893 *Academy of Sciences* 109: 21510–21515
- 894 R Core Team (2019) R: A Language and Environment for Statistical Computing. Vienna,  
895 Austria
- 896 Raj B & Blencowe BJ (2015) Alternative Splicing in the Mammalian Nervous System: Recent  
897 Insights into Mechanisms and Functional Roles. *Neuron* 87: 14–27
- 898 Reber S, Stettler J, Filosa G, Colombo M, Jutzi D, Lenzken SC, Schweingruber C, Bruggmann  
899 R, Bachi A, Barabino SM, *et al* (2016) Minor intron splicing is regulated by FUS and  
900 affected by ALS -associated FUS mutants. *EMBO J* 35: 1504–1521
- 901 Roczniak-Ferguson A & Ferguson SM (2020) Pleiotropic requirements for human TDP-43 in  
902 the regulation of cell and organelle homeostasis. 12
- 903 Rokach O, Sekulic-Jablanovic M, Voermans N, Wilmshurst J, Pillay K, Heytens L, Zhou H,  
904 Muntoni F, Gautel M, Nevo Y, *et al* (2015) Epigenetic changes as a common trigger of  
905 muscle weakness in congenital myopathies. *Hum Mol Genet* 24: 4636–4647
- 906 Salajegheh M, Pinkus JL, Taylor JP, Amato AA, Nazareno R, Baloh RH & Greenberg SA  
907 (2009) Sarcoplasmic redistribution of nuclear TDP-43 in inclusion body myositis:  
908 Redistribution of TDP-43. *Muscle Nerve* 40: 19–31
- 909 Shen S, Park JW, Lu Z, Lin L, Henry MD, Wu YN, Zhou Q & Xing Y (2014) rMATS: Robust  
910 and flexible detection of differential alternative splicing from replicate RNA-Seq data.  
911 *Proc Natl Acad Sci USA* 111: E5593–E5601
- 912 Shiga A, Ishihara T, Miyashita A, Kuwabara M, Kato T, Watanabe N, Yamahira A, Kondo C,  
913 Yokoseki A, Takahashi M, *et al* (2012) Alteration of POLDIP3 Splicing Associated  
914 with Loss of Function of TDP-43 in Tissues Affected with ALS. *PLoS ONE* 7: e43120
- 915 Tapial J, Ha KCH, Sterne-Weiler T, Gohr A, Braunschweig U, Hermoso-Pulido A, Quesnel-  
916 Vallières M, Permanyer J, Sodaei R, Marquez Y, *et al* (2017) An atlas of alternative  
917 splicing profiles and functional associations reveals new regulatory programs and genes  
918 that simultaneously express multiple major isoforms. *Genome Res* 27: 1759–1768
- 919 Tollervey JR, Curk T, Rogelj B, Briese M, Cereda M, Kayikci M, König J, Hortobágyi T,  
920 Nishimura AL, Župunski V, *et al* (2011) Characterizing the RNA targets and position-  
921 dependent splicing regulation by TDP-43. *Nat Neurosci* 14: 452–458

- 922 Vogler TO, Wheeler JR, Nguyen ED, Hughes MP, Britson KA, Lester E, Rao B, Betta ND,  
923 Whitney ON, Ewachiw TE, *et al* (2018) TDP-43 and RNA form amyloid-like myo-  
924 granules in regenerating muscle. *Nature* 563: 508–513
- 925 Weihl CC, Temiz P, Miller SE, Watts G, Smith C, Forman M, Hanson PI, Kimonis V &  
926 Pestronk A (2008) TDP-43 accumulation in inclusion body myopathy muscle suggests  
927 a common pathogenic mechanism with frontotemporal dementia. *Journal of*  
928 *Neurology, Neurosurgery & Psychiatry* 79: 1186–1189
- 929 Wood M, Quinet A, Lin Y-L, Davis AA, Pasero P, Ayala YM & Vindigni A (2020) TDP-43  
930 dysfunction results in R-loop accumulation and DNA replication defects. *J Cell Sci*  
931 133: jcs244129
- 932 Yamashita S, Kimura E, Tawara N, Sakaguchi H, Nakama T, Maeda Y, Hirano T, Uchino M  
933 & Ando Y (2013) Optineurin is potentially associated with TDP-43 and involved in the  
934 pathogenesis of inclusion body myositis: Optineurin in inclusion body myositis.  
935 *Neuropathology and Applied Neurobiology* 39: 406–416
- 936 Yamashita S, Matsuo Y, Tawara N, Hara K, Yamamoto M, Nishikami T, Kawakami K, Zhang  
937 X, Zhang Z, Doki T, *et al* (2019) CYLD dysregulation in pathogenesis of sporadic  
938 inclusion body myositis. *Sci Rep* 9: 11606
- 939 Yeo G, Holste D, Kreiman G & Burge CB (2004) Variation in alternative splicing across  
940 human tissues. *Genome Biology*: 15
- 941 Yu G, Wang L-G, Han Y & He Q-Y (2012) clusterProfiler: an R Package for Comparing  
942 Biological Themes Among Gene Clusters. *OMICS: A Journal of Integrative Biology*  
943 16: 284–287

944

## 945 FIGURES

946

947 **Figure 1. TDP-43 expression and functional consequences of TDP-43 silencing in C2C12**  
948 **and NSC34 cells.**

949 **A** Western blot shows similar expression of endogenous TDP-43 in C2C12 and NSC34 cells.  
950 The amount of TDP-43 was normalized to the sum of peak intensities of three loading controls  
951 (tubulin, HSP70 and P84) (n = 3 replicates per group).

952 **B** Expression levels of *Tardbp* in TDP-43-silenced C2C12 and NSC34 and corresponding  
953 controls assessed by RNA-seq plotted as log<sub>10</sub>-transformed FPKM values show TDP-43 was  
954 depleted (on the mRNA level) to the same extent in both cell lines (n = 3 replicates per group).  
955  $p_{\text{adj}} = 1.6 \cdot 10^{-18}$  for C2C12 and  $p_{\text{adj}} = 2.3 \cdot 10^{-72}$  for NSC34. p-values were generated using Wald  
956 test and Benjamini-Hochberg multiple testing correction (Love *et al*, 2014).

957 **C** Western blot shows the reduction of TDP-43 in C2C12 and NSC34 cells upon siTDP  
958 transfection. siLUC-transfected cells were used as a control. TDP-43 expression was  
959 normalized against GAPDH (n = 3 replicates per group).

960 **D** TDP-43 depletion led to altered splicing of *Poldip3* and *Sort1*. Semi quantitative RT-PCRs  
961 conducted in TDP-43-silenced samples and corresponding controls are shown along with the  
962 quantification of splicing changes (% of alternative exon inclusion). The number of the  
963 alternative exon is given below (see the exact transcript numbers in **Appendix Table S1**, n =  
964 3 replicates per group).

965 **E** PCA plot visualizes distances between siLUC- and siTDP-transfected C2C12 and NSC34  
966 cells based on FPKM of all genes obtained by RNA-seq (left). Variation in the PC2 is explained  
967 by the presence/absence of TDP-43 (right).

968

969 **Figure 2. TDP-43 mediates transcription levels of different mRNAs in C2C12 and NSC34**  
970 **cells.**

971 **A** Venn diagram shows the number of TDP-43-regulated transcripts identified in C2C12 and  
972 NSC34 cells exclusively (1695 and 1694, respectively), along with those that are commonly  
973 regulated by TDP-43 in both cell types (630). Transcripts with  $p_{\text{adj}} < 0.05$  were considered as  
974 differentially expressed irrespective their  $\log_2$  fold change.

975 **B** The Venn diagram shows the overlap (599 transcripts, 19.3%) of TDP-43-regulated DEG  
976 identified in C2C12 and NSC34 cell line (as in (A)), considering only transcripts expressed in  
977 both cell lines (FPKM in both cell lines  $> 0.5$ ). Transcripts with  $p_{\text{adj}} < 0.05$  were considered as  
978 differentially expressed irrespective their  $\log_2$  fold change.

979 **C** Transcription changes of common targets ((A), 630) are plotted by their  $\log_2$  fold change  
980 values in C2C12 and NSC34 (Spearman's  $\rho = 0.77$ , p-value  $< 2.2 \cdot 10^{-16}$ ). Grey line represents  
981  $y = x$  and the blue line represents the fitted regression.

982 **D** TDP-43-mediated transcription changes in C2C12 and NSC34 represented as volcano plots.  
983 C2C12- and NSC34-specific targets are shown in red and blue, respectively, while common  
984 targets are plotted as grey dots. Vertical lines indicate fold changes of 0.7 (30% increase) and  
985 1.3 (30% decrease). Best hits are labelled with gene names.

986 **E** The Venn diagram shows the number of cell-type-specific and overlapping GO terms  
987 enriched by DEGs identified in C2C12 or NSC34 cells. GO terms (category: biological  
988 process) were grouped based on their names as those implying muscle- (red) or neuron-related  
989 features (blue).

990 **F** Representative GO terms (category: biological process) commonly enriched by DEGs in  
991 C2C12 and NSC34 cells suggesting pathological abnormalities described in neurodegenerative  
992 and myodegenerative disease (hand curated).

993

994 Appendix figure S1. **DEGs detected in C2C12 and NSC34.**

995 **A** The plot shows  $\log_{10}$ -transformed FPKM values of muscular, neuronal and common TDP-  
996 43 targets in siLUC-transfected C2C12 and NSC34 cells. C2C12-specific DEGs exhibit higher  
997 expression in C2C12 cells ( $p\text{-value} < 2.2 \cdot 10^{-16}$ ), while NSC34-specific DEGs have higher  
998 expression in NSC34 ( $p\text{-value} < 2.2 \cdot 10^{-16}$ ). Expression levels of common targets is more  
999 similar between cell lines ( $p\text{-value} = 0.02$ ). Significance was tested using Wilcoxon signed-  
1000 rank test.

1001 **B** The diagram shows the number of upregulated and downregulated genes detected in C2C12  
1002 and NSC34 cells following TDP-43 silencing.

1003 **C** Expression changes of representative DEGs (C2C12-specific vs. common vs. NSC34-  
1004 specific, **Fig 2D**) as assessed by RNA-seq and plotted as  $\log_{10}$ -transformed FPKM.

1005 **D** Relative expression changes of DEGs from (C) were validated using qPCR.  $p$ -values were  
1006 generated using Student's t test (paired, one-tailed,  $n \geq 3$  per group).

1007 **E** Scatter plots show there is no correlation between the absolute change in gene expression  
1008 following TDP-43 depletion (plotted as  $\log_2$ -transformed fold change) and the baseline  
1009 expression of a given transcript (FPKM in siLUC-transfected cells) for DEGs identified in  
1010 C2C12 (2325) and NSC34 (2324) (Spearman's  $\rho = -0.50$ ,  $p\text{-value} < 2.2 \cdot 10^{-16}$  and Spearman's  
1011  $\rho < -0.48$ ,  $p\text{-value} < 2.2 \cdot 10^{-16}$ , respectively).

1012 **F** Average *per gene* PhyloP conservation scores plotted as box plots show TDP-43-regulated  
1013 DEGs detected in C2C12 (2325) and NSC34 (2324) are equally well conserved across species  
1014 ( $p\text{-value} = 0.48$ ).  $p$ -value was generated using Wilcoxon rank sum test, the grey line represents  
1015 the median of average PhyloP scores of all exons in the mouse genome.

1016 **G** The number of DEGs found in commonly enriched GO terms (**Fig 2E**, 459) is similar  
1017 between two cell lines (left). Grey line represents  $y = x$  and the blue line the fitted regression  
1018 (Spearman's  $\rho = 0.95$ ,  $p\text{-value} < 2.2 \cdot 10^{-16}$ ). Frequency plot shows that commonly regulated  
1019 terms are highly enriched for cell-type-specific TDP-43-regulated DEGs (right).

1020

1021 **Figure 3. TDP-43-regulated splicing changes show cell-type specificity.**

1022 **A** Venn diagram shows the total number of AS events (detected by rMATS at FDR < 0.01)  
1023 induced by TDP-43 depletion in C2C12 and NSC34 specifically (630 and 1170, respectively),  
1024 together with those commonly detected in both cell lines (100).

1025 **B** The number of annotated AS events (**A**) visualized by event type. SE - exon skipping, MXE  
1026 - mutually exclusive exons, RI - intron retention, A3'SS and A5'SS - alternative 3' or 5' splice  
1027 site. The percentage of overlapping AS events is reported on the plot.

1028 **C** Venn diagram shows the total number of AS events (detected by rMATS as in (**A**)) occurring  
1029 in transcripts, which are expressed in both cell lines (FPKM in both cell lines > 0.5).

1030 **D** The percentage of common (green) and cell-type-specific (grey) TDP-43-dependent splicing  
1031 events detected in C2C12 and NSC34 as assessed by MAJIQ (in contrast to (**A**)-(**C**) and (**E**)-  
1032 (**G**), where rMATS was used).

1033 **E** Venn diagrams show the number of alternatively spliced transcripts (as detected by rMATS,  
1034 FDR < 0.01) in C2C12 and NSC34 cells together with GO terms (category: biological process,  
1035  $p_{adj} < 0.05$ ) enriched in AS genes detected in each cell line.

1036 **F** GO terms uniquely enriched in NSC34 (198) imply on deregulation of neuronal processes,  
1037 mRNA metabolism and DNA biology in NSC34 cells (representative GO terms are shown on  
1038 the plot).

1039 **G** GO terms uniquely enriched in C2C12 (18) suggest involvement of TDP-43-regulated AS  
1040 genes in DNA-modifying processes (representative GO terms are shown on the plot).

1041

1042 Appendix figure S2. **General features of TDP-43-controlled AS events detected in C2C12**  
1043 **and NSC34.**

1044 **A** TDP-43-regulated AS events detected in C2C12 and NSC34 cells do not differ in terms of  
1045 event type distribution (the number below shows the total number of AS events detected in  
1046 each cell line);

1047 **B** the average length of TDP-43-regulated cassette exons (SE and MXE);

1048 **C** the ratio between inclusion/exclusion events;

1049 **D** the percentage of frame-conserving events.

1050 **E** Average *per exon* PhyloP conservation scores plotted as box plots show TDP-43-regulated  
1051 alternative sequences detected in NSC34 cells (4281) are better conserved across species than

1052 those detected in C2C12 cells (2372) ( $p\text{-value} = 1.1 \cdot 10^{-4}$ ).  $p$ -value was generated using  
1053 Wilcoxon rank sum test with continuity correction, the grey line represents the median of  
1054 average PhyloP scores of all exons in the mouse genome.

1055 **F** Average *per exon* PhyloP conservation scores of TDP-43-regulated alternative sequences  
1056 stratified by event type (SE, MXE, RI, A3'SS, A5'SS). The difference ( $p\text{-value} = 6.5 \cdot 10^{-6}$ )  
1057 among all groups was tested with Kruskal-Wallis rank sum test, followed by pairwise  
1058 comparisons using Wilcoxon rank sum test with Benjamini-Hochberg correction for multiple  
1059 testing. Significant difference is highlighted only for within event comparison between two  
1060 tissues, SE ( $p\text{-value} = 9.7 \cdot 10^{-3}$ ). The grey line represents the median of average PhyloP scores  
1061 of all exons in the mouse genome.

1062 **G** Venn diagram shows the total number of AS events detected by rMATS at relaxed threshold  
1063 (considering events that were detected at  $FDR < 0.01$  in one dataset and  $p\text{-value} < 0.05$  in the  
1064 other).

1065 **H** GO enrichment analysis (refers to **Fig 3G**) was performed on alternatively spliced genes  
1066 detected in C2C12 using less stringent threshold for genes which entered GO analysis ( $p\text{-value}$   
1067  $< 0.01$  instead of  $FDR < 0.01$ ). Resulting GO terms (45) imply on dysregulation of DNA-  
1068 related biological processes.

1069

1070 **Figure 4. Expression of RNA-binding proteins in C2C12 and NSC34 cells.**

1071 **A** Boxplot shows that NSC34 cells on average display higher expression of 63 RNA-binding  
1072 proteins compared (Mele *et al*, 2015) compared to C2C12 cells ( $p\text{-value} = 0.0028$ ). Average  
1073 expression levels are plotted as  $\log_{10}$ -transformed FPKM values of all 63 transcripts and  $p$ -  
1074 value was generated using Wilcoxon signed-rank test.

1075 **B** Expression of 63 RBPs (plotted as  $\log_{10}$ -transformed FPKM values) in C2C12 and NSC34  
1076 cells (Spearman's  $\rho = 0.94$ ;  $p\text{-value} < 2.2 \cdot 10^{-16}$ ). Those with higher expression in one cell line  
1077 than another ( $> 150\%$ ) are shown in red (C2C12) or blue (NSC34). Grey line represents  $y = x$ .

1078 **C** Venn diagram shows RBPs the expression of which changes following TDP-43 reduction.  
1079 The overlapping event is downregulation of *Tardbp*.

1080

1081 **Figure 5. Commonly regulated TDP-43 splicing targets are more often frame-conserving,**  
1082 **display higher expression levels and undergo bigger changes in isoform proportion.**



1083 **A** Validation of TDP-43 dependent splicing of 10 representative mRNA targets. Semi  
1084 quantitative RT-PCR conducted in TDP-43-silenced samples and corresponding controls is  
1085 shown along with the quantification of splicing changes (% of alternative exon inclusion). The  
1086 number of the alternative exon is shown in the scheme (see the exact transcript numbers in  
1087 **Appendix Table S1**, n = 3 replicates per group).

1088 **B** Average expression levels of transcripts that are commonly spliced in both cell  
1089 lines (164) or in one cell line exclusively (1268) is plotted as  $\log_{10}$ -transformed FPKM values  
1090 (p-value <  $2.2 \cdot 10^{-16}$ ).

1091 **C** Absolute changes ( $\Delta$ PSI) of overlapping splicing events (100) compared to those uniquely  
1092 occurring in C2C12 or NSC34 (1800) (p-value =  $1.0 \cdot 10^{-7}$ ). p-values for **(B)** and **(C)** were  
1093 generated by unpaired Wilcoxon rank sum test.

1094 **D** The correlation of splicing changes for commonly detected splicing events (100) plotted as  
1095  $\Delta$ PSI in C2C12 and NSC34 (Spearman's correlation coefficient  $\rho = 0.62$ , p-value =  $4.1 \cdot 10^{-12}$ ).

1096 **E** The percentage of frame-preserving AS events among those that commonly occur in both  
1097 cell lines (100) and those regulated by TDP-43 in a cell-type specific manner (1800).

1098 **F** Average *per exon* PhyloP conservation scores plotted as box plots show TDP-43-regulated  
1099 alternative sequences detected in both cell lines (634) are better conserved across species than  
1100 those detected in one cell line exclusively (6019) (p-value = 0.02). p-value was generated using  
1101 Wilcoxon rank sum test, the grey line represents the median of average PhyloP scores of all  
1102 exons in the mouse genome.

1103

1104 Appendix figure S3. **Transcripts subject to TDP-43-dependent splicing and expression**  
1105 **level changes.**

1106 **A** Venn diagrams show the percentage of transcripts affected by TDP-43 loss due to altered  
1107 splicing (AS) or changes in the overall transcript abundance (DEG) in each cell line (21.9% of  
1108 AS genes in C2C12 and 21.0% of AS genes in NSC34, respectively).

1109 **B** The barplot shows the percentage of down- and upregulated genes among those subject to  
1110 altered splicing following TDP-43 loss.

1111 **C** A representative KEGG pathway (axon guidance pathway, mmu04360) significantly  
1112 enriched ( $p_{\text{adj}} < 0.05$ ) in AS and DE genes in NSC34 cells demonstrates that TDP-43 might  
1113 influence axon guidance by regulating AS and expression levels of transcripts encoding  
1114 proteins that participate in the given biological process. Proteins encoded by AS transcripts are  
1115 shown in yellow and those encoded by DEG are shown in blue.

1116

1117 **Figure 6. Alternative exons regulated by TDP-43 in mouse are subject to TDP-43**  
1118 **regulation in human cell lines or not.**

1119 **A** Western blot shows efficient reduction of TDP-43 in SH-SY5Y and RH-30 cells upon siTDP  
1120 transfection. The amount of TDP-43 was normalized against GAPDH or tubulin (n = 3  
1121 replicates per group).

1122 **B** TDP-43 depletion led to altered splicing of *POLDIP3*. Semi quantitative RT-PCR conducted  
1123 in TDP-43-silenced samples and corresponding controls is shown along with the quantification  
1124 of splicing changes (% of alternative exon inclusion). The number of the alternative exon is  
1125 given below (n = 3 replicates per group).

1126 **C** Alternatively spliced exons regulated by TDP-43 in mouse cells are either subject to TDP-  
1127 43 regulation in human cells (*PPFIBP1* exon 19 and *ASAP2* exon 23) or not (*TRAF7* exon 5  
1128 and *NFYA* exon 3). Semi quantitative RT-PCRs conducted in TDP-43-silenced samples and  
1129 corresponding controls are shown along with the quantification of splicing changes (% of  
1130 alternative exon inclusion). The number of the alternative exon is given in the scheme (see the  
1131 exact transcript numbers in **Appendix Table S2**, n = 3 replicates per group).

1132 **D** Schematic representation of TDP-43 binding sites identified by iCLIP analysis in SH-SY5Y  
1133 cells (Tollervey *et al*, 2011) in the vicinity of exons represented on panel (C).

1134

1135 **Figure 7. Inclusion of TDP-43-controlled exons is altered in TDP-43-proteinopathies.**

1136 **A** Inclusion levels (PSI) of six alternative exons in skeletal muscle biopsies in IBM patients vs.  
1137 healthy controls (n = 4 per group).

1138 **B** PSI of six alternative exons in different brain regions (motor cortex, lumbar spinal cord,  
1139 cervical spinal cord) of ALS patients and healthy controls (n motor cortex: 223 ALS and 23  
1140 ctrl, n cervical spinal cord: 134 ALS and 32 ctrl, n lumbar spinal cord 136 ALS and 33 ctrl).

1141 **C** PSI of six alternative exons in frontal and temporal cortices of FTLD patients with reported  
1142 TDP-43 pathology and healthy controls (n frontal cortex: 33 FTLD and 40 ctrl, n temporal  
1143 cortex: 30 FTLD and 23 ctrl). (A)-(C) p-values were generated using Wilcoxon rank sum test.  
1144 \* p-value < 0.05, \*\* p-value < 0.01, \*\*\* p-value < 0.001.

1145 **D** Schematic summary of all splicing alterations (A)-(C) detected in skeletal muscles of IBM  
1146 patients and across neuroanatomical regions of ALS and FTLD patients compared to healthy

1147 controls. Dark green marks significant changes, which occur in the same direction as in TDP-  
1148 43-depleted SH-SY5Y and RH-30 cells (refers to **Fig 6C**); light green marks non-significant  
1149 changes that occur in the expected direction (p-value is reported in the scheme); red marks  
1150 significant changes occurring in the opposite direction relative to TDP-43-depleted SH-SY5Y  
1151 and RH-30 cells; light red marks non-significant changes that occur in the opposite direction  
1152 (p-value is reported in the scheme).

1153

1154 Appendix figure S4. **Tissue-characteristic inclusion of alternative exons regulated by TDP-**  
1155 **43.**

1156 **A** Dot plots demonstrate variable inclusion levels of alternative exons across different brain  
1157 regions of healthy controls (in the absence of TDP-43 pathology), as exemplified by two  
1158 alternative exons – exon 23 of *ASAP2* and exon 13 of *TBC1D1*. p-values (p-value =  $1.6 \cdot 10^{-9}$   
1159 for *ASAP2* and p-value =  $2.4 \cdot 10^{-11}$  for *TBC1D1*, respectively) were generated using Kruskal-  
1160 Wallis chi-squared test.

1161 **B** TDP-43-dependent splicing of exon 14 of mouse *Tnik* and exons 12 and 13 of mouse *Tbc1d1*  
1162 occur in cell-type-specific fashion in mouse C2C12 and NSC34 cells.

1163 **C** Exon 15 of human *TNIK* is regulated by TDP-43 in both, SH-SY5Y and RH-30 cell line,  
1164 likely in a direct fashion by TDP-43 binding in the upstream intron as shown in **(D)**. The long  
1165 isoform of *TBC1D1* gene (exons 12 and 13 included) is not expressed in undifferentiated SH-  
1166 SY5Y and RH-30 cells, as inclusion of exons 12 and 13 increases with differentiation (Bland  
1167 *et al*, 2010), however, TDP-43 binding sites were identified in the vicinity of exons represented  
1168 on panel **(D)**. **(B)-(C)** Semi quantitative RT-PCRs conducted in TDP-43-silenced cells and  
1169 corresponding controls are shown along with the quantification of splicing changes (% of  
1170 alternative exon inclusion) (see the exact transcript numbers in **Appendix Table S1** and **S2**, n  
1171 = 3 replicates per group).

1172 **D** Schematic representation of TDP-43 binding sites identified by iCLIP analysis in SH-SY5Y  
1173 cells (Tollervey *et al*, 2011) in the vicinity of exons represented on panel **(C)**.

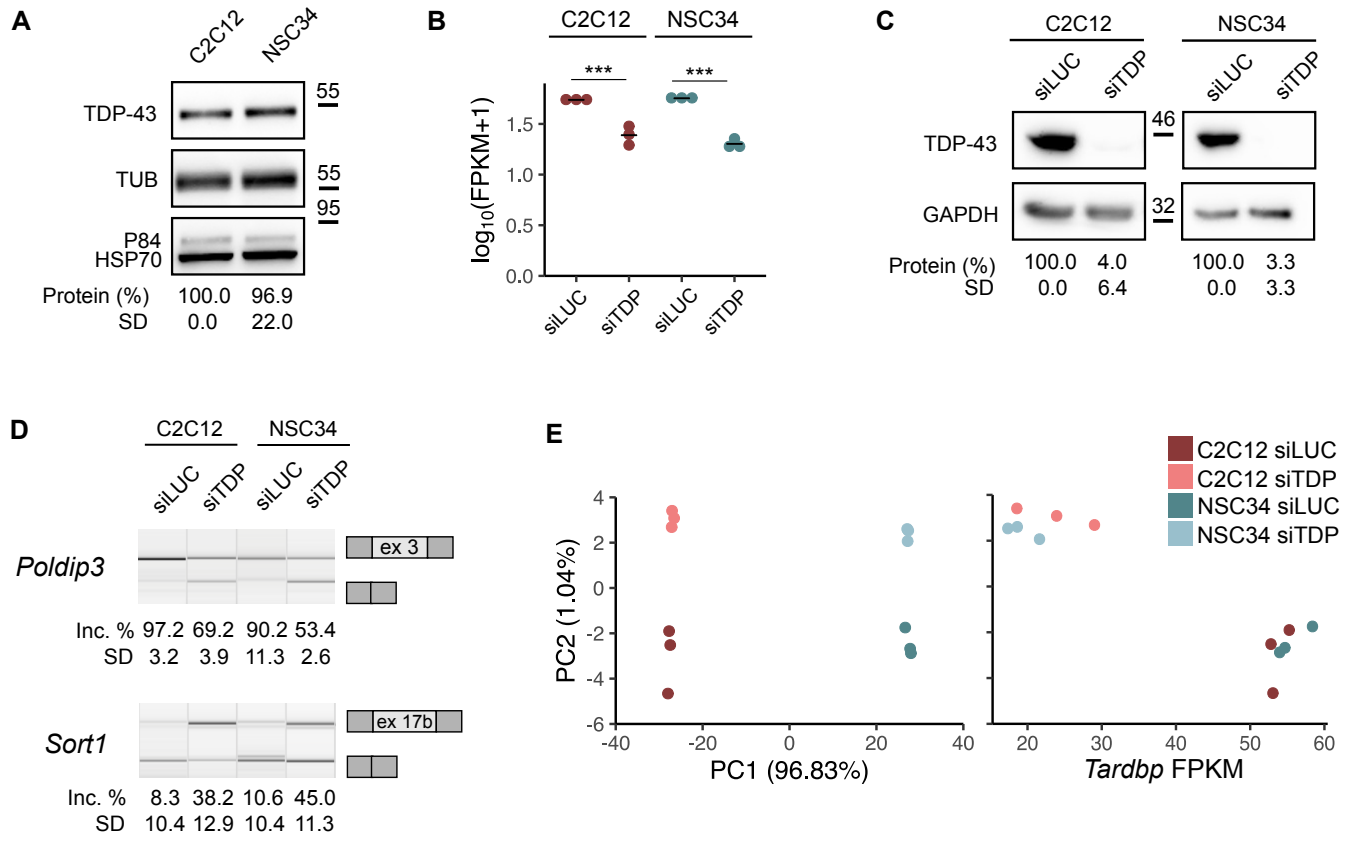

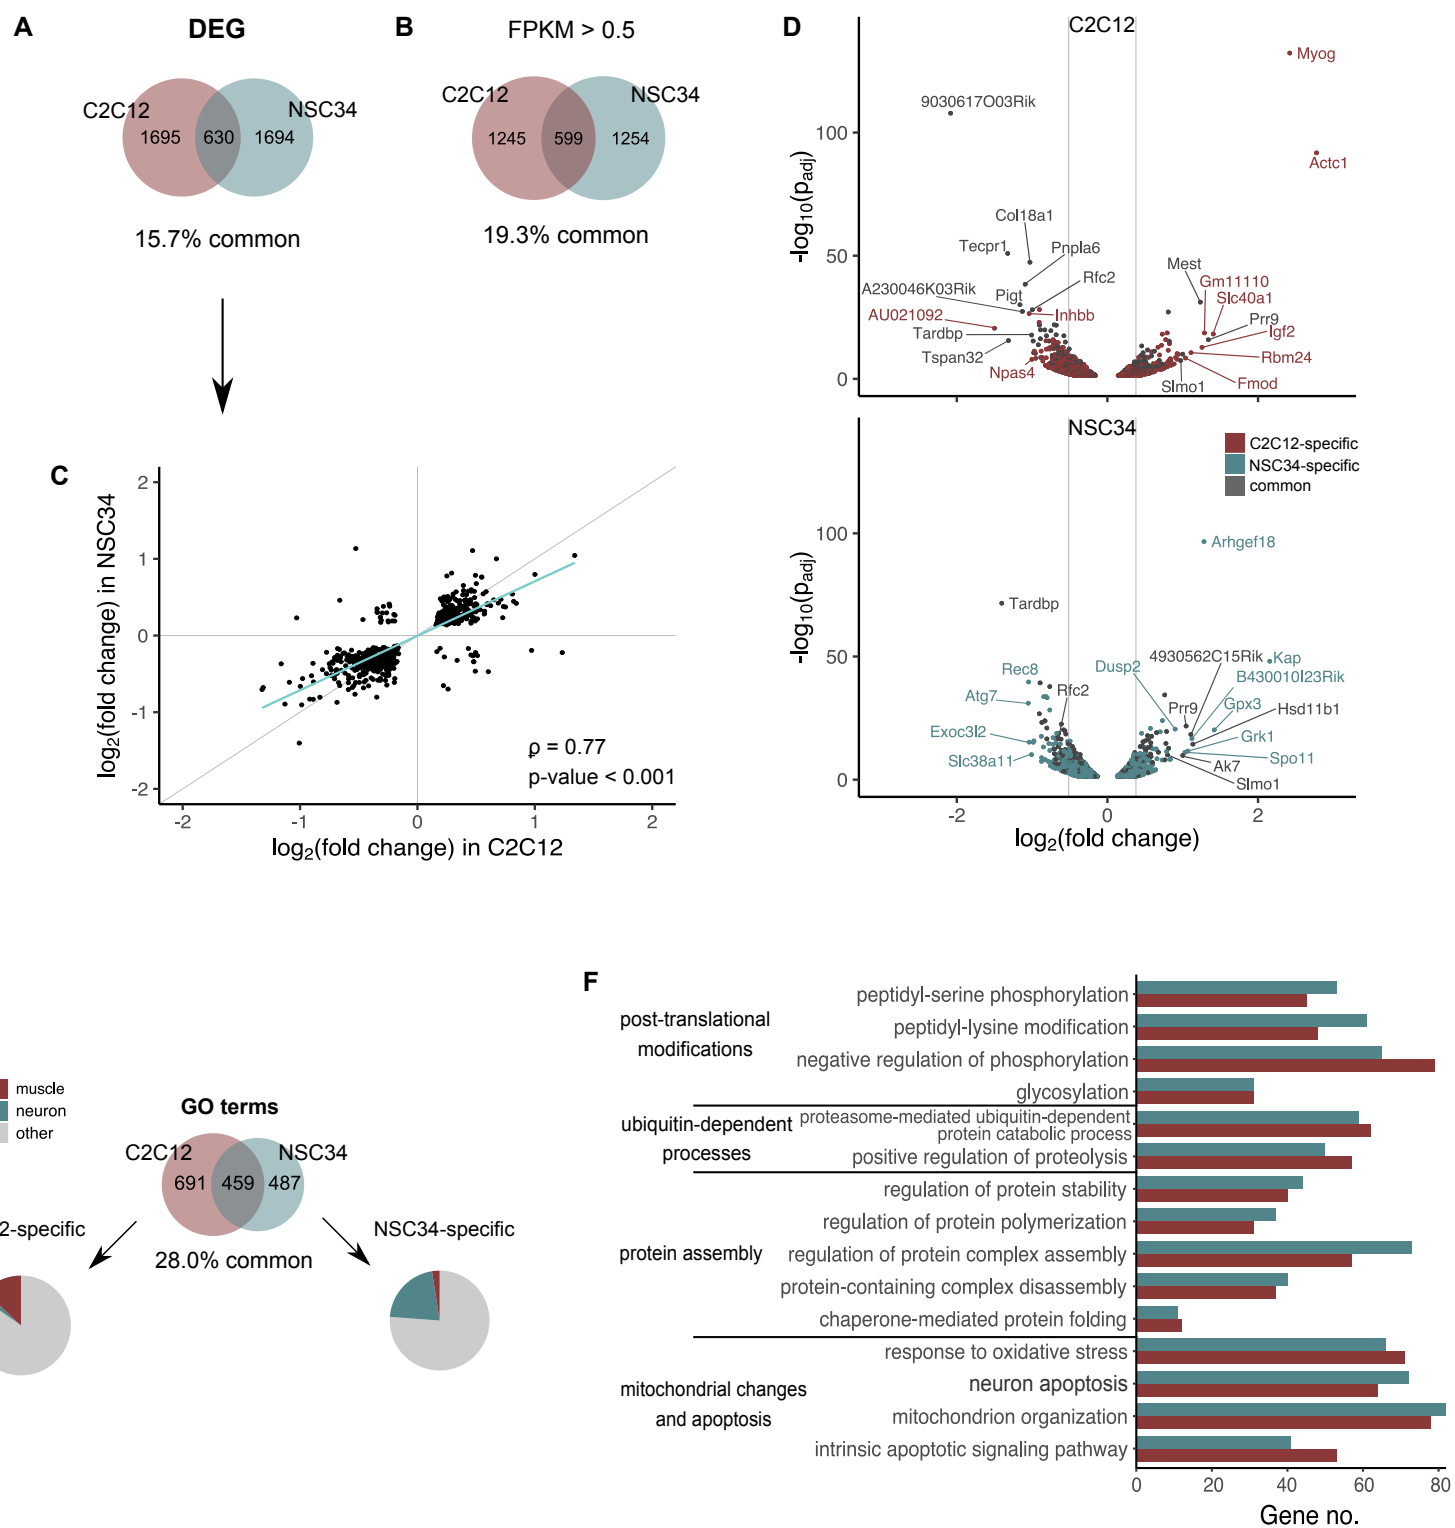

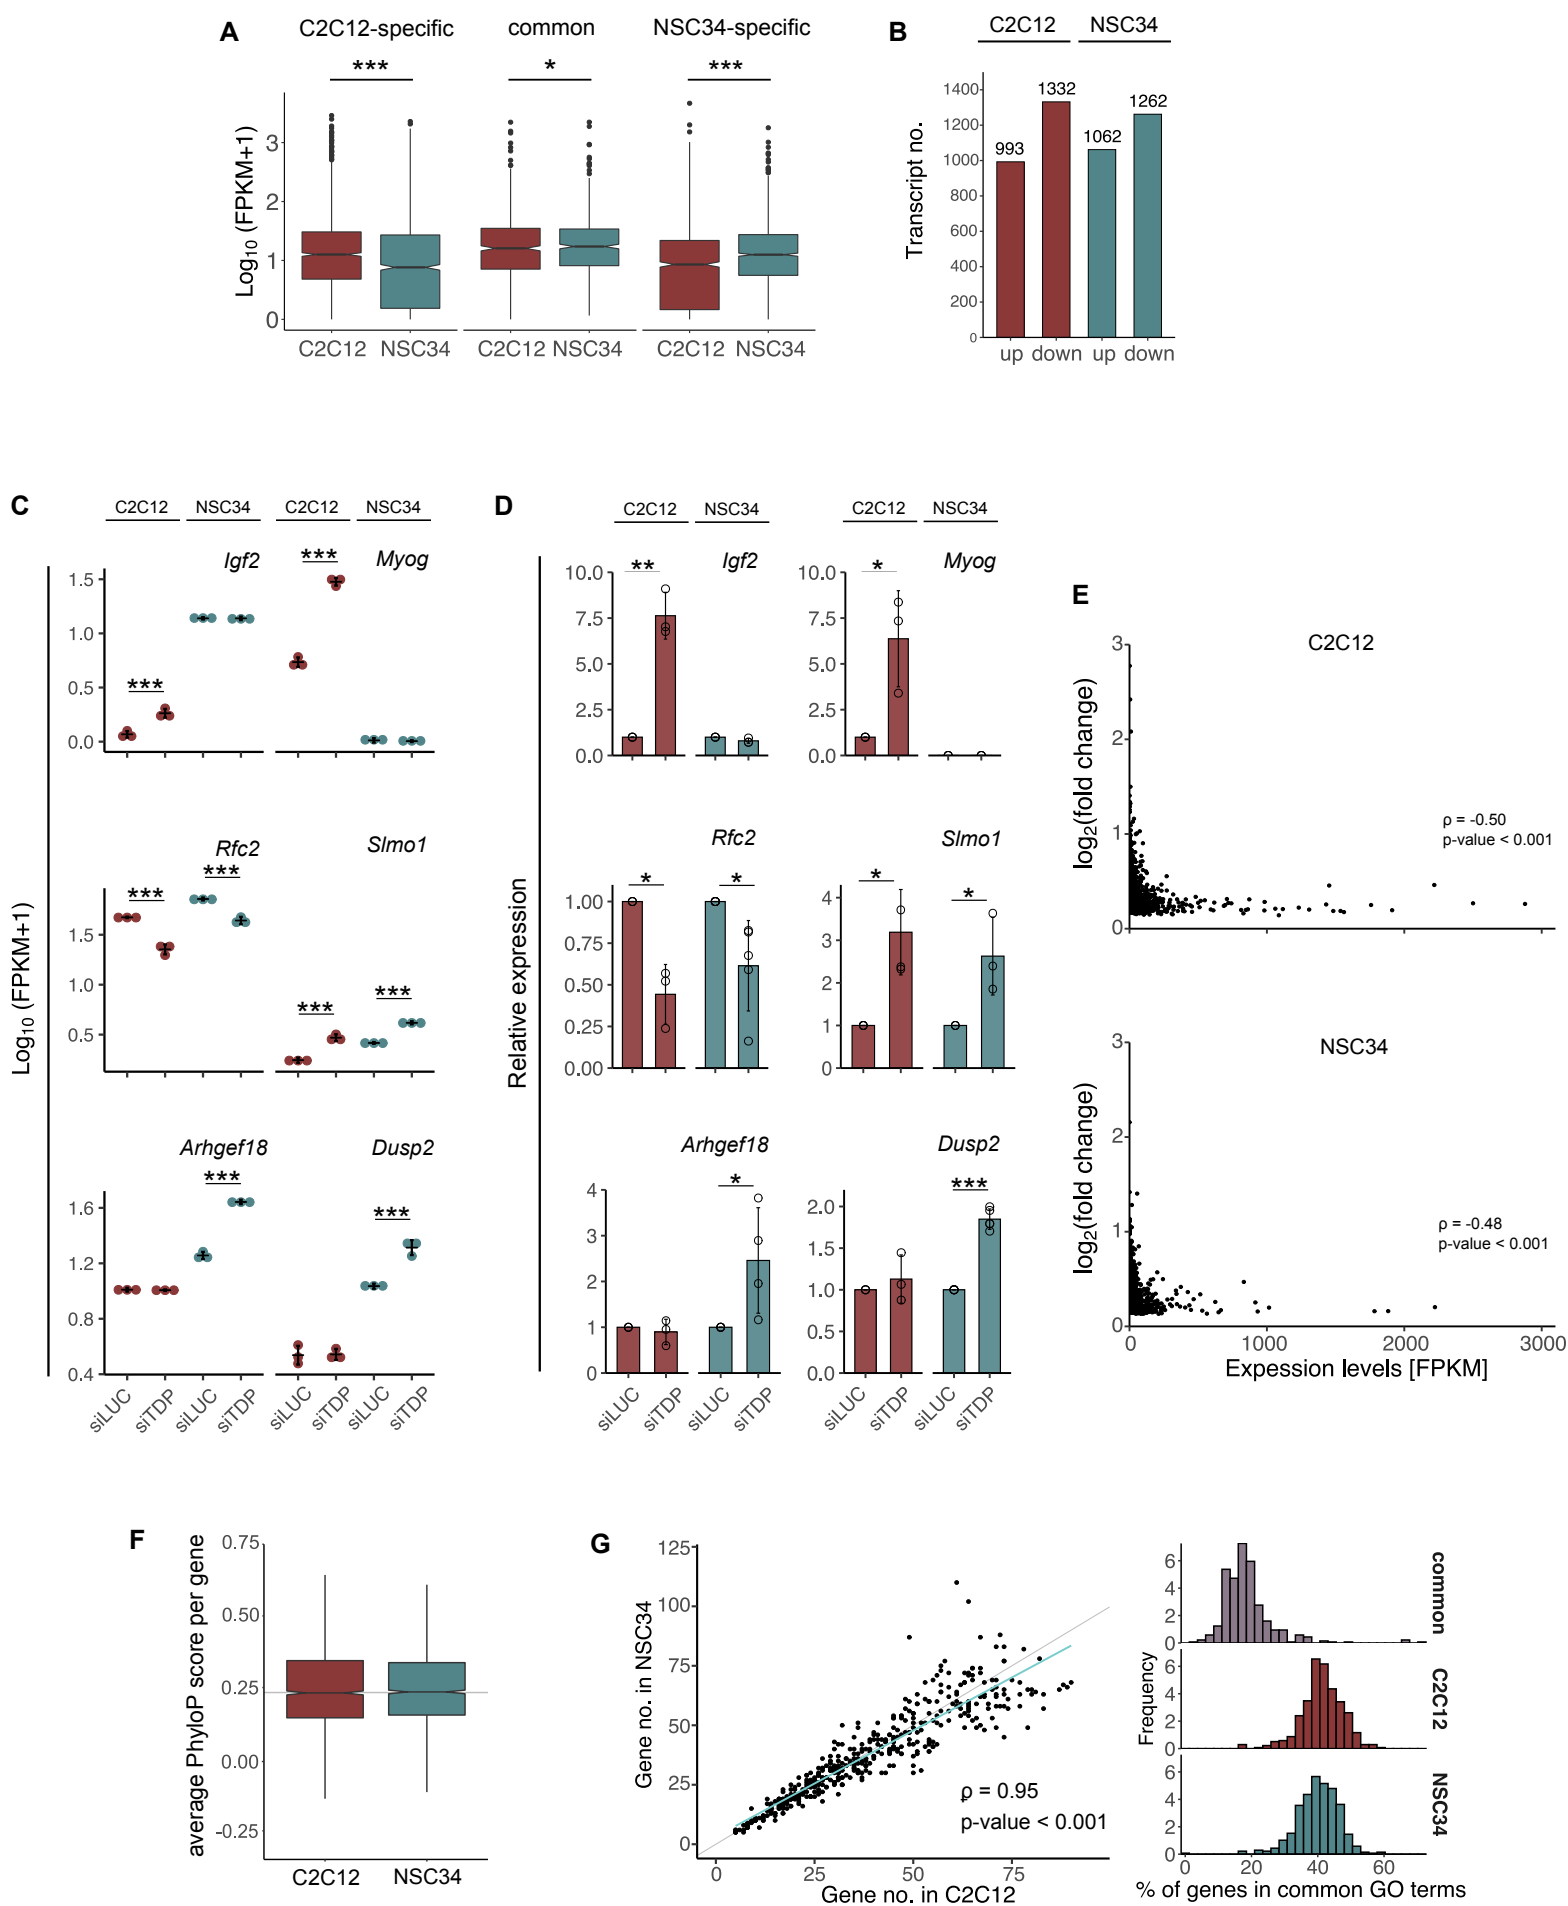

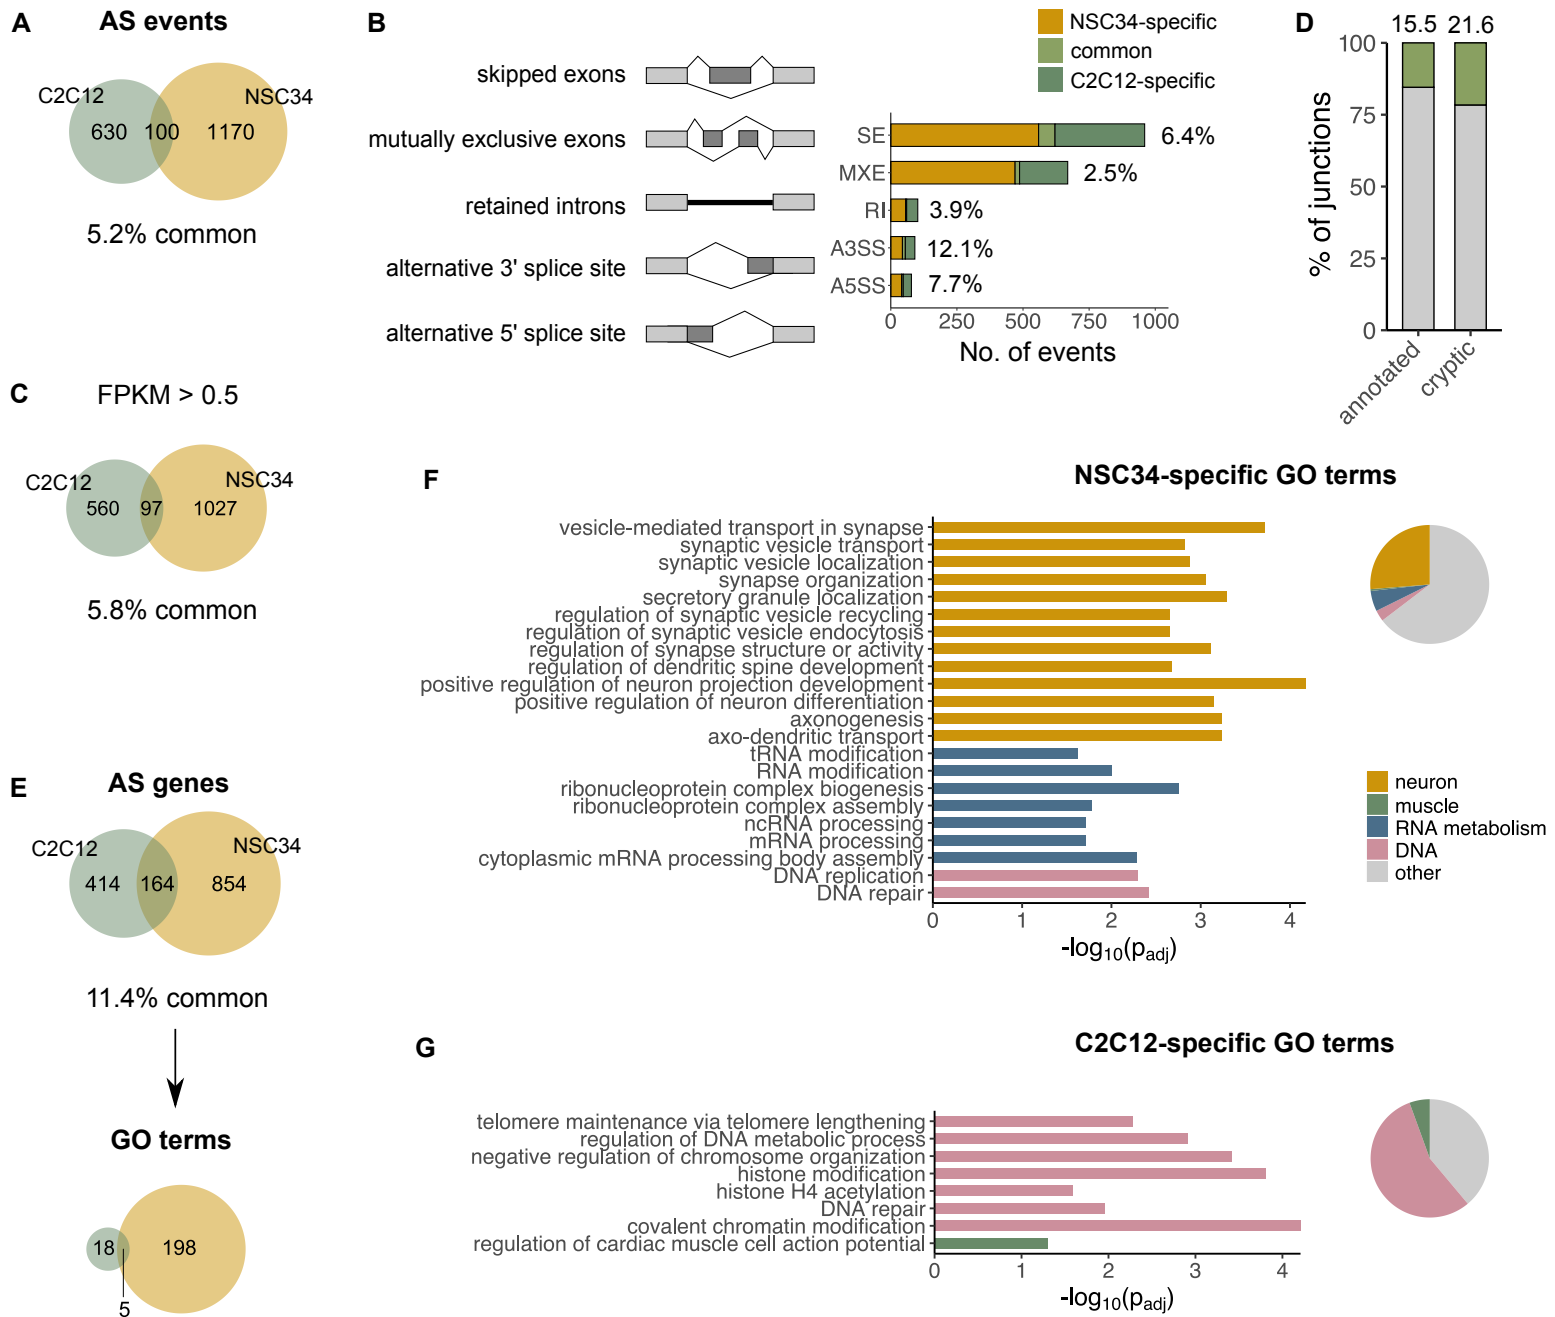

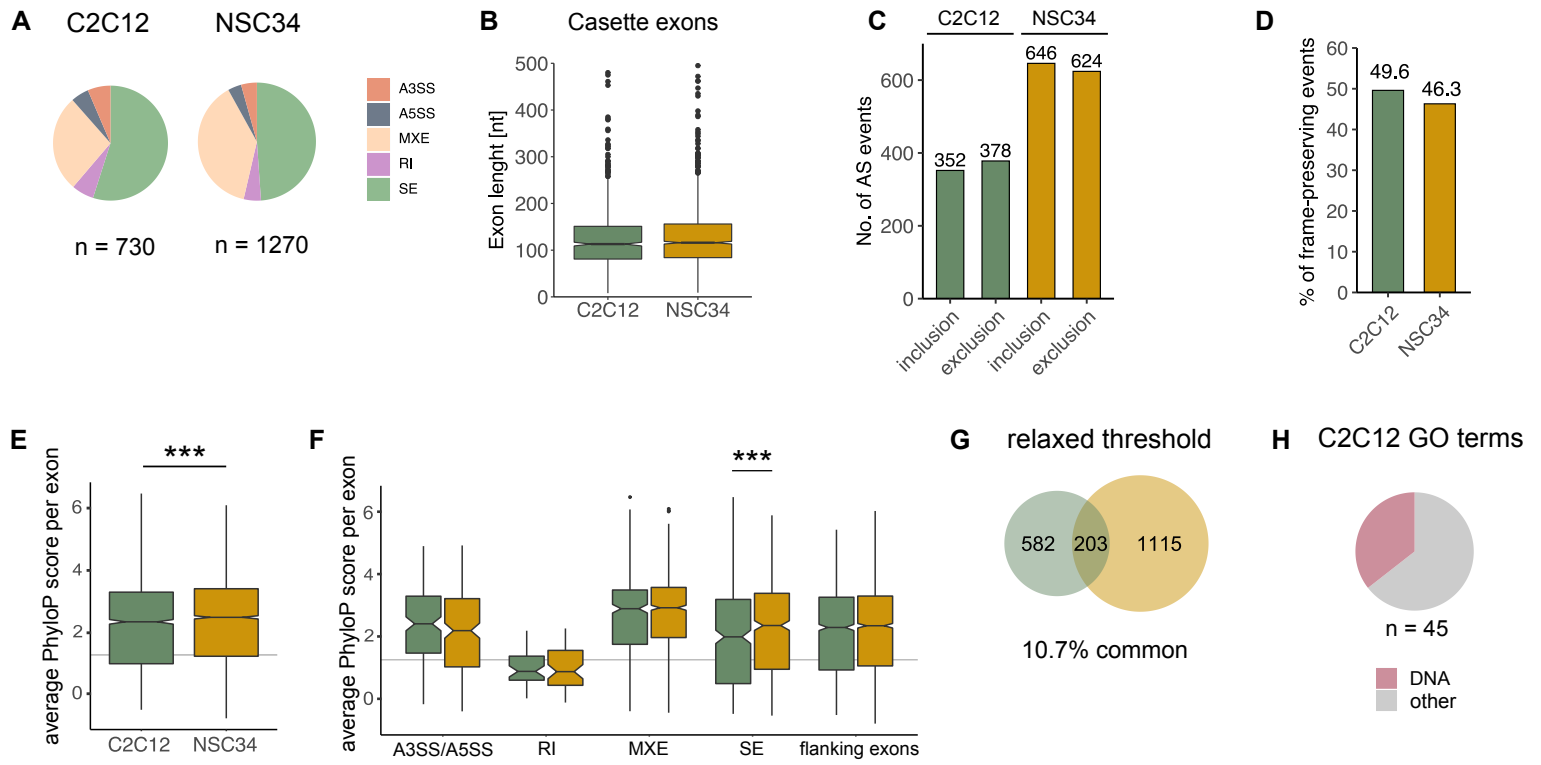



Figure 4

bioRxiv preprint doi: <https://doi.org/10.1101/2021.04.20.440589>; this version posted April 23, 2021. The copyright holder for this preprint (which was not certified by peer review) is the author/funder, who has granted bioRxiv a license to display the preprint in perpetuity. It is made available under a [CC-BY-NC-ND 4.0 International license](https://creativecommons.org/licenses/by-nc-nd/4.0/).

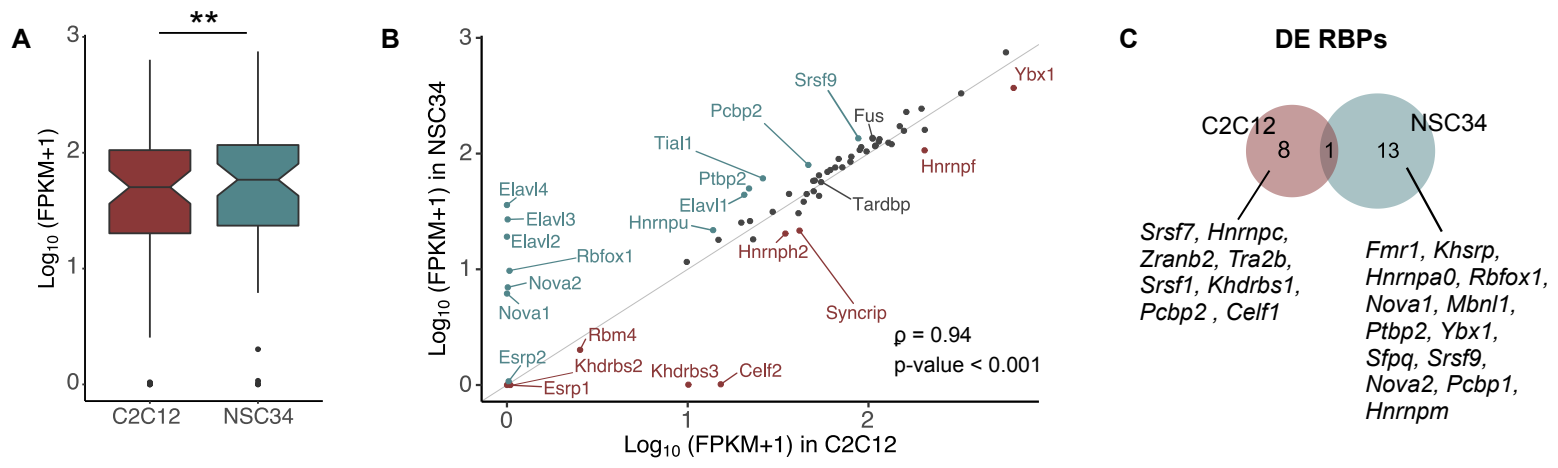

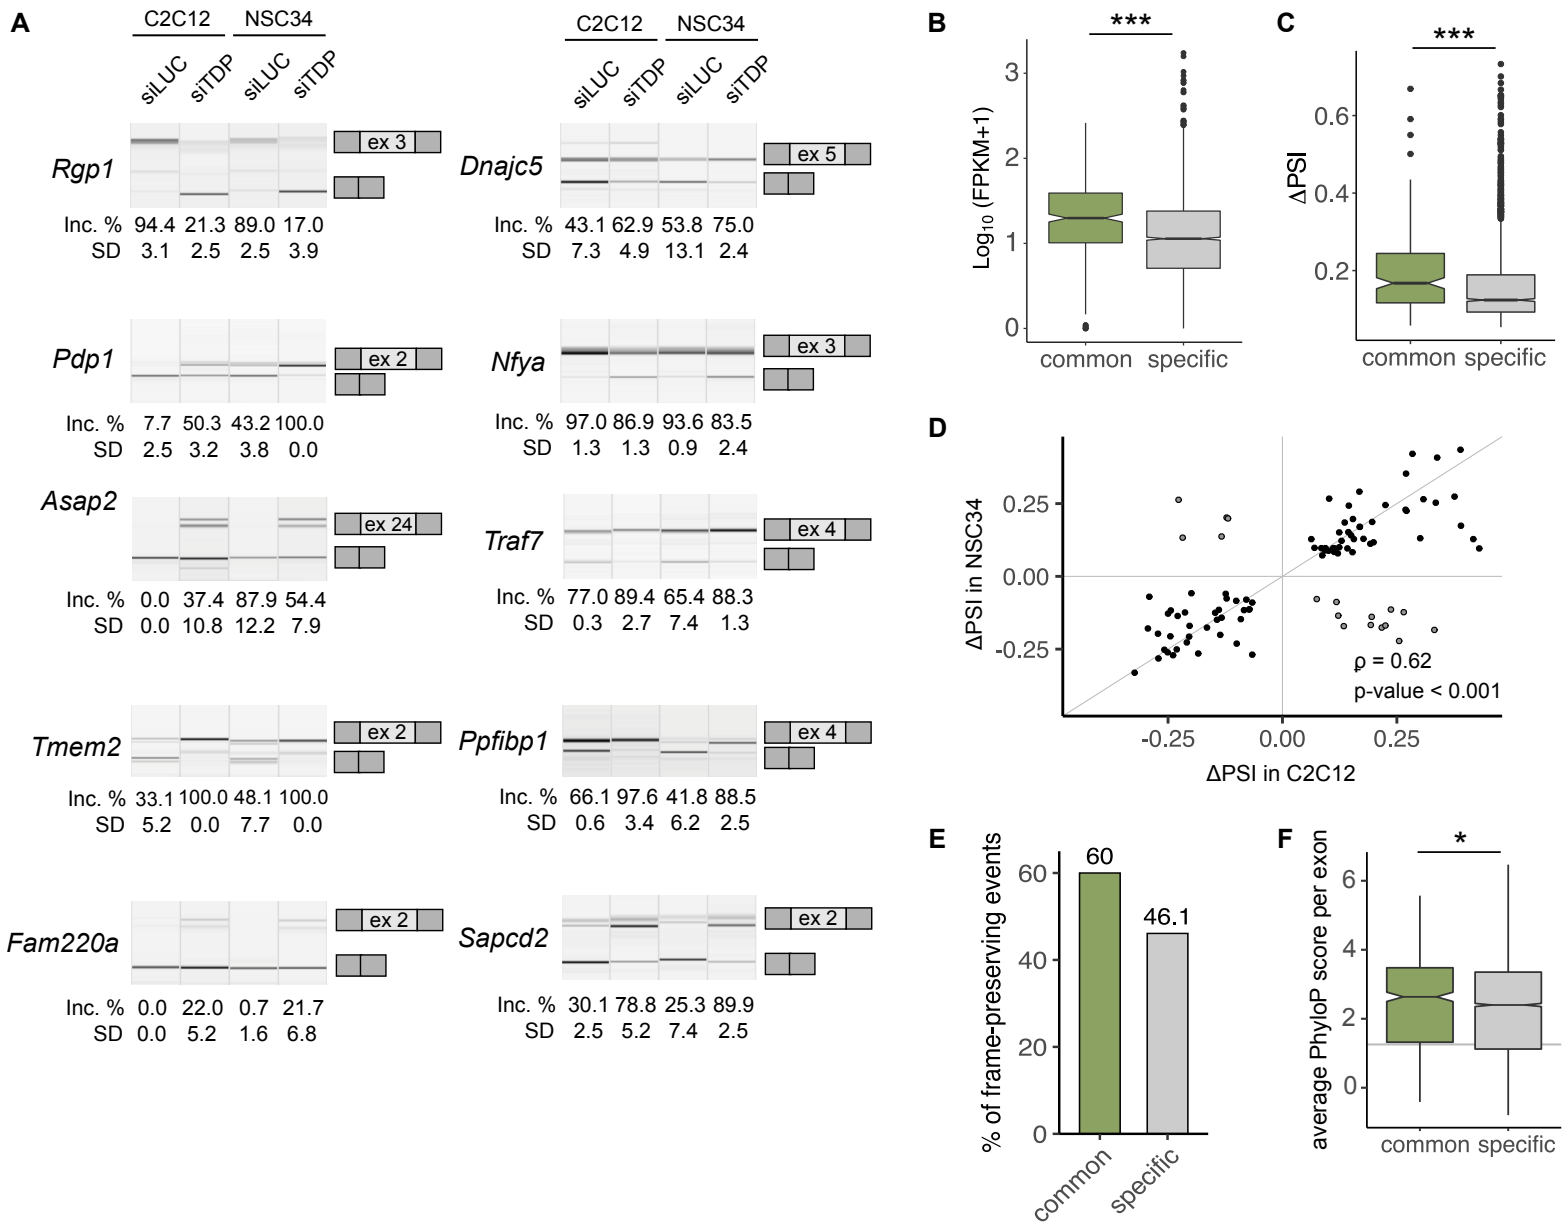

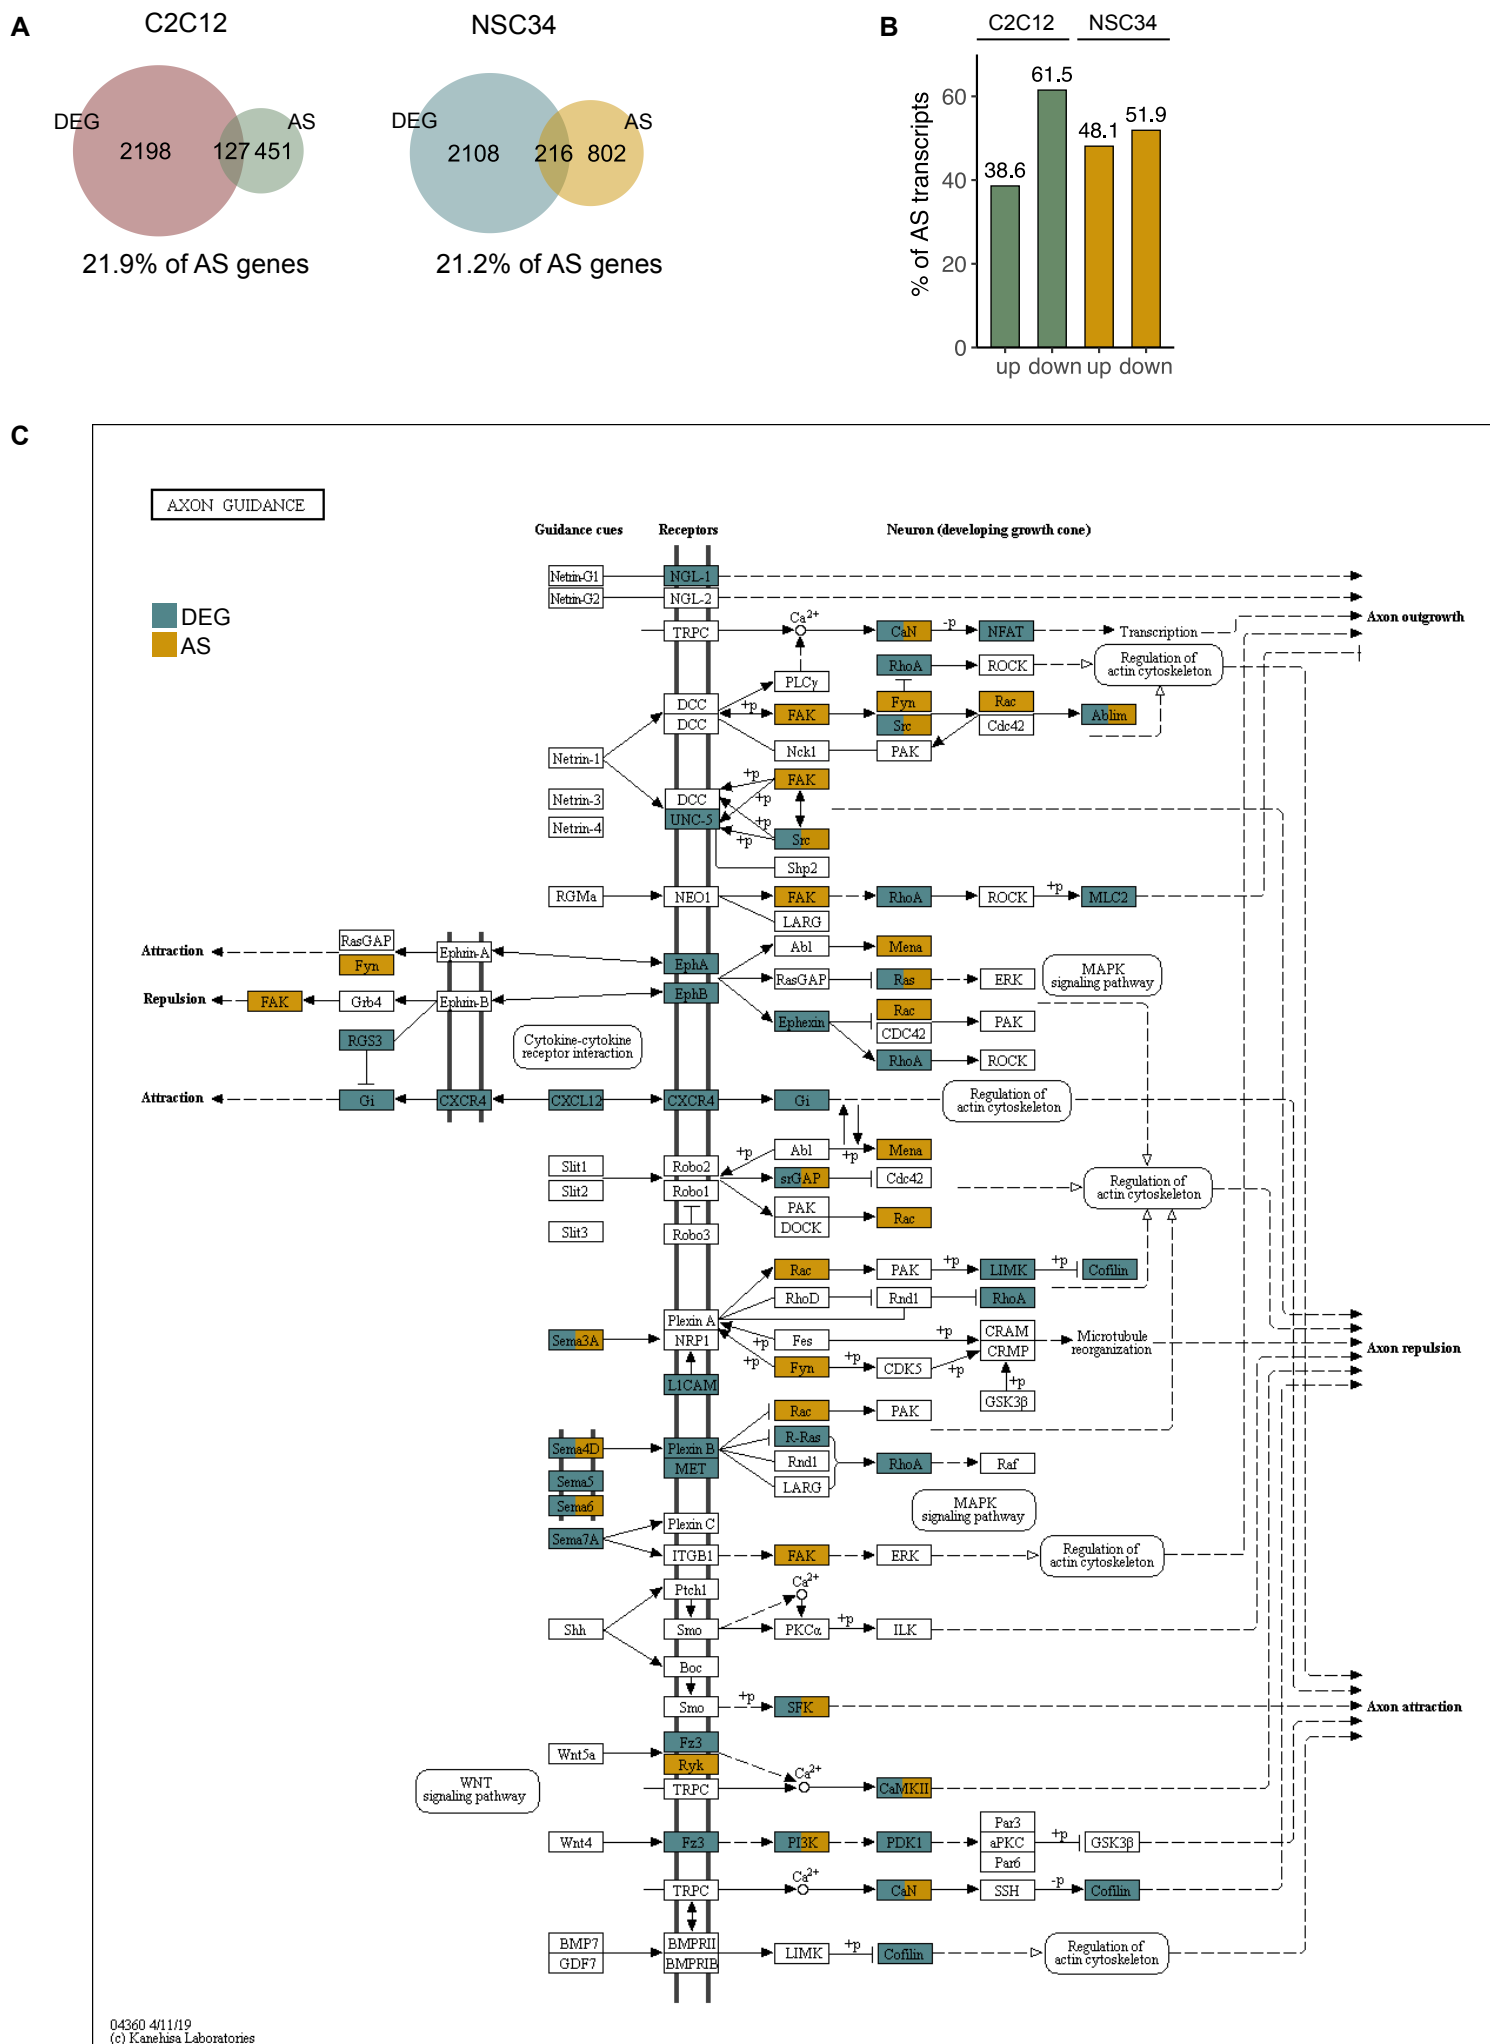

Figure 6

bioRxiv preprint doi: <https://doi.org/10.1101/2021.04.20.440589>; this version posted April 23, 2021. The copyright holder for this preprint (which was not certified by peer review) is the author/funder, who has granted bioRxiv a license to display the preprint in perpetuity. It is made available under a [CC-BY-NC-ND 4.0 International license](https://creativecommons.org/licenses/by-nc-nd/4.0/).

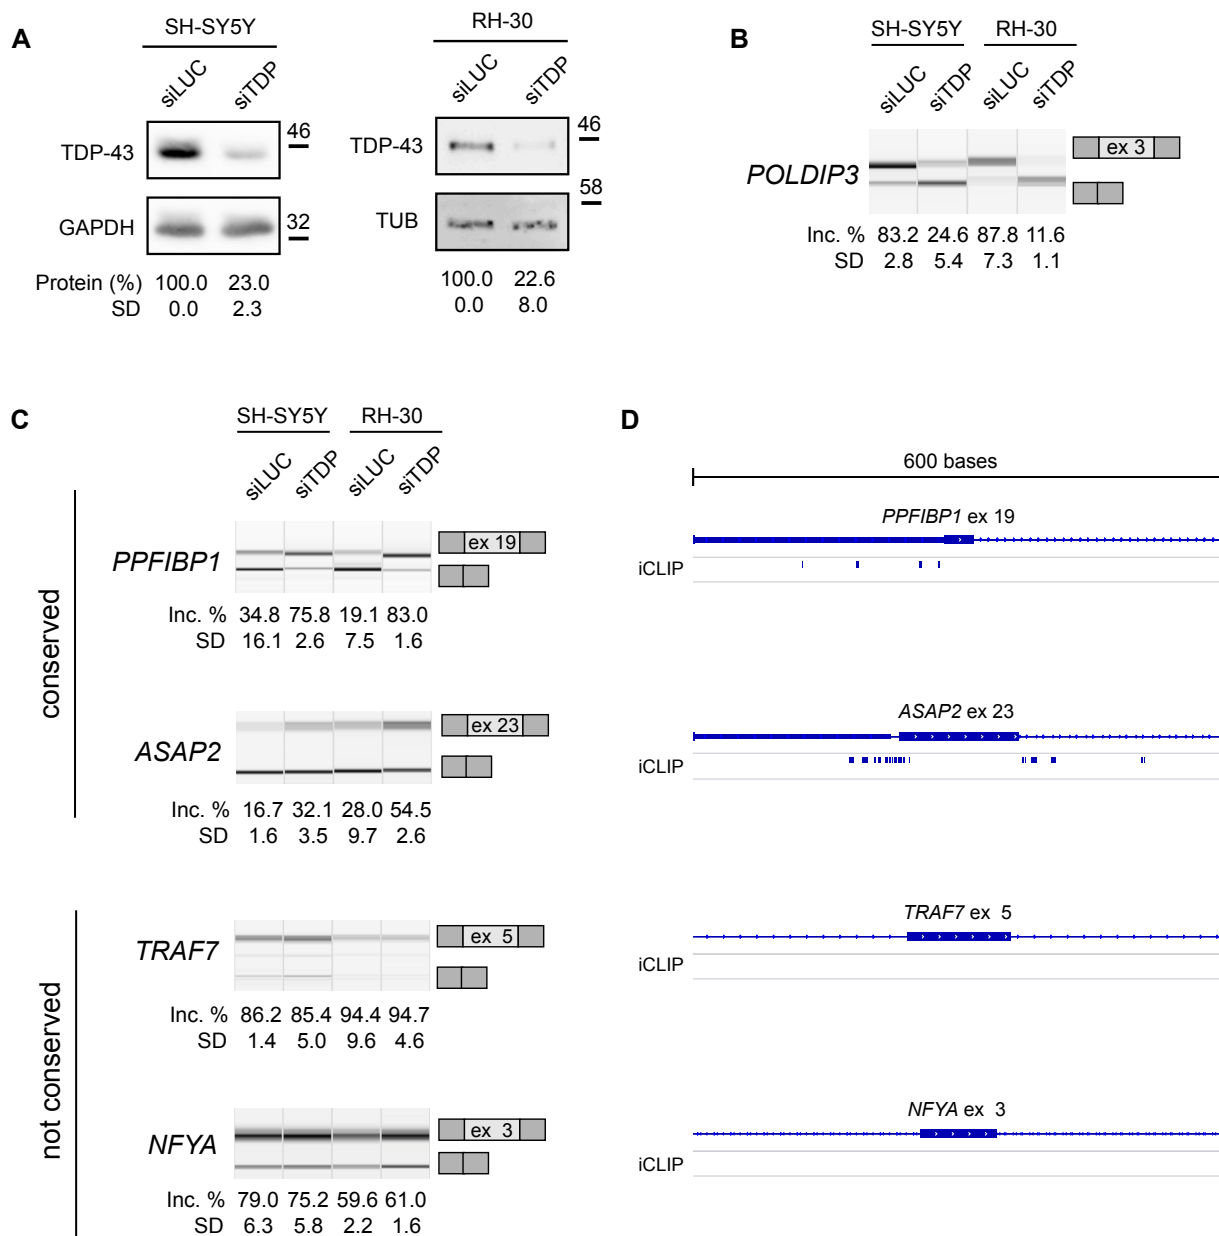

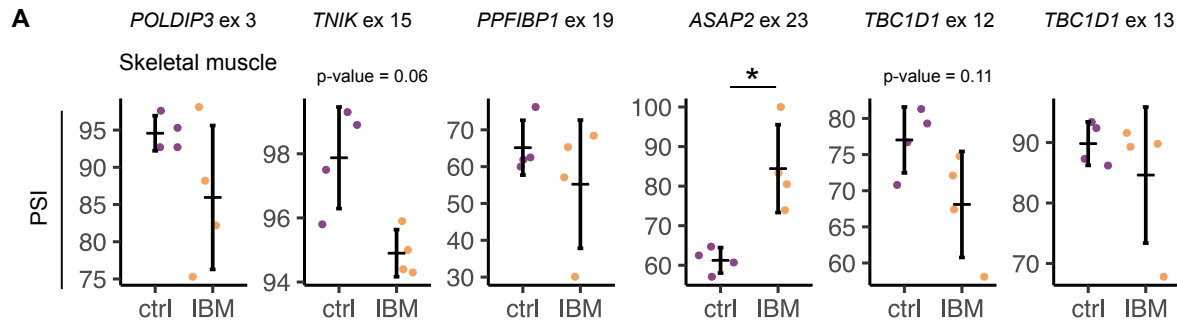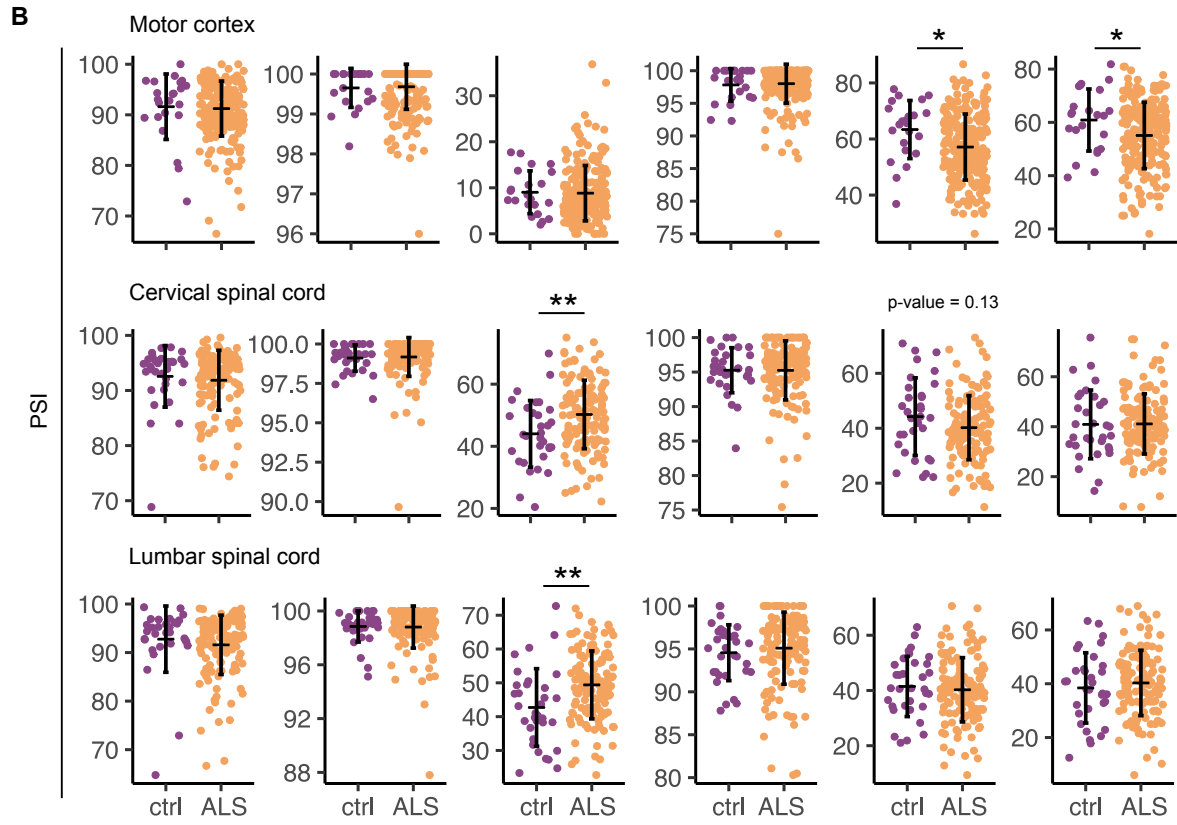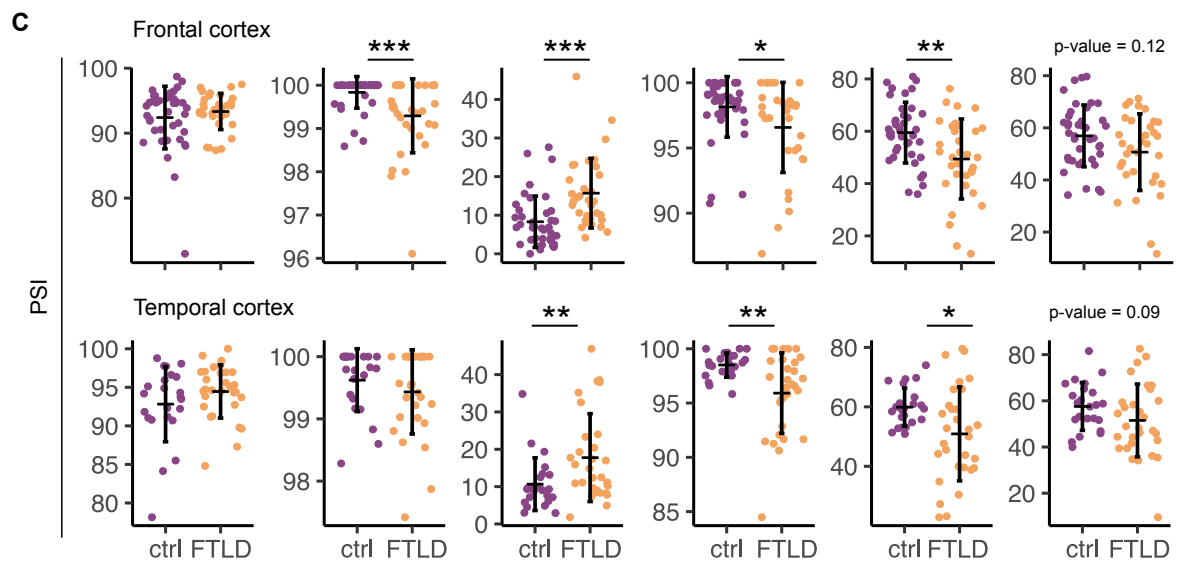

**D**

|                          | <i>POLDIP3</i> ex 3 | <i>TNIK</i> ex 15 | <i>PPFIBP1</i> ex 19 | <i>ASAP2</i> ex 23 | <i>TBC1D1</i> ex 12 | <i>TBC1D1</i> ex 13 |
|--------------------------|---------------------|-------------------|----------------------|--------------------|---------------------|---------------------|
| IBM skeletal muscle      |                     | p = 0.06          |                      |                    | p = 0.11            |                     |
| ALS motor cortex         |                     |                   |                      |                    |                     |                     |
| ALS cervical spinal cord |                     |                   |                      |                    | p = 0.13            |                     |
| ALS lumbar spinal cord   |                     |                   |                      |                    |                     |                     |
| FTLD frontal cortex      |                     |                   |                      |                    |                     | p = 0.12            |
| FTLD temporal cortex     |                     |                   |                      |                    |                     | p = 0.09            |

significant, expected direction  
 non-sig, expected direction  
 significant, opposing direction  
 non-sig, opposing direction

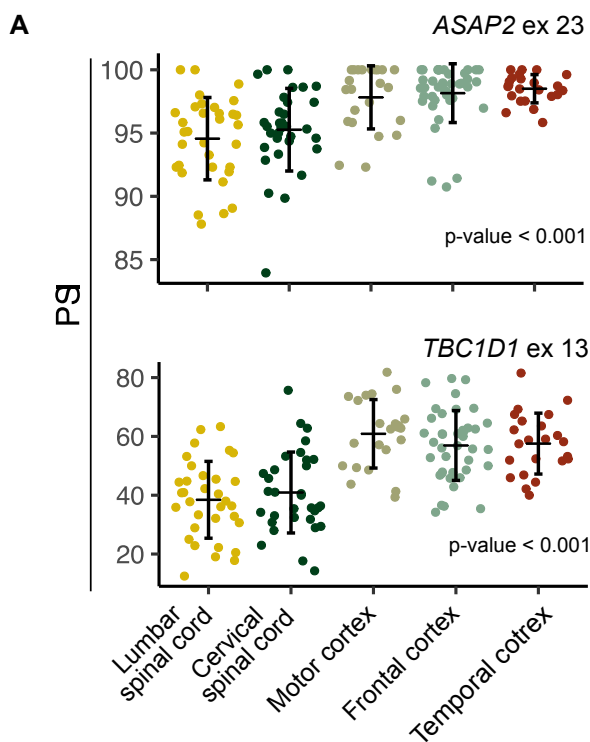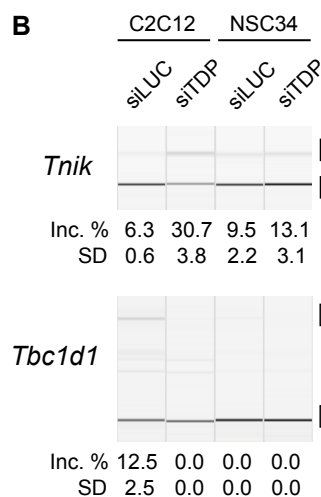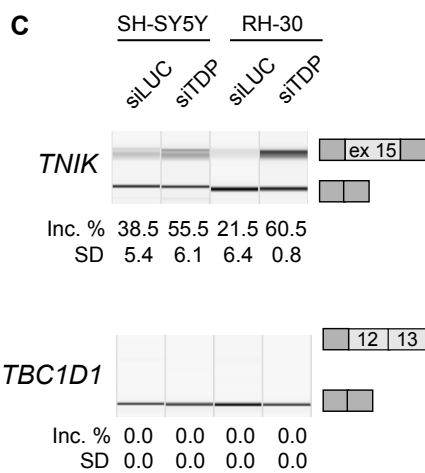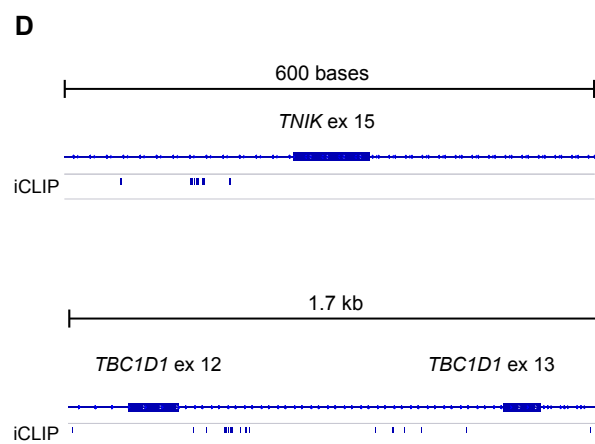

Source: https://www.biorxiv.org/content/10.1101/2021.04.20.440589v1.full.pdf
